# Supplementary material for: Geometry-dependent divergence in the gold-catalyzed redox cascade cyclization of o-alkynylaryl ketoximes and nitrones leading to isoindoles
Source: Royal Society of Chemistry journal article supplement (doi:10.1039/b910757f), 2009-01-01

Supporting Information

Geometry-Dependent Divergence in Gold-Catalyzed Redox  
Cascade Cyclization of *o*-Alkynylaryl Ketoximes and  
Nitrones Leading to Isoindoles

Hyun-Suk Yeom,<sup>a</sup> Youngun Lee,<sup>a</sup> Ji-Eun Lee,<sup>b</sup> Seunghoon Shin<sup>\*a</sup>

<sup>a</sup> *Department of Chemistry, Hanyang University, Seoul 133-791, Korea*

<sup>b</sup> *Department of Chemistry, Gyeongsang National University, Chinju 660-701,  
Korea*

## Table of Contents

|                                                                                            |     |
|--------------------------------------------------------------------------------------------|-----|
| 1. Table S1: Screening of Solvents in the Conversion of <b>(Z)-1e</b> into <b>3e</b> ..... | 3   |
| 2. Table S2: Screening of Ligands in the Conversion of <b>(Z)-1e</b> into <b>3e</b> .....  | 3   |
| 3. X-ray Crystallographic Data for <b>3e</b> .....                                         | 4   |
| 4. <sup>1</sup> H and <sup>13</sup> C NMR spectra of substrates.....                       | 7   |
| 5. <sup>1</sup> H and <sup>13</sup> C NMR spectra of products .....                        | 30- |

**Table S1.** Screening of Solvents in the Conversion of (Z)-1e into 3e

| entry <sup>a</sup> | solvent                              | conversion (%) <sup>b</sup> | yield (%) <sup>b</sup> |
|--------------------|--------------------------------------|-----------------------------|------------------------|
| 1                  | DMF                                  | 39                          | 20                     |
| 2                  | CH <sub>3</sub> CN                   | 49                          | 22                     |
| 3                  | CH <sub>3</sub> NO <sub>2</sub>      | >95                         | 70                     |
| 4                  | CHCl <sub>3</sub>                    | >95                         | 65                     |
| 5                  | MeOH                                 | >95                         | 58                     |
| 6                  | ClCH <sub>2</sub> CH <sub>2</sub> Cl | >95                         | 64                     |
| 7                  | THF                                  | 83                          | 53                     |
| 8                  | toluene                              | 93                          | 65                     |

<sup>a</sup>Conditions: Au(IMes)OTf (5 mol %) at 70 °C in solvents (sealed tube); after 4 h, the reaction was quenched with Et<sub>3</sub>N. <sup>b</sup>Crude NMR yield.

**Table S2.** Screening of Ligands in the Conversion of (Z)-1e into 3e

| entry <sup>a</sup> | ligand                                              | conversion (%) <sup>a</sup> | yield (%) <sup>a</sup> |
|--------------------|-----------------------------------------------------|-----------------------------|------------------------|
| 1                  | PPh <sub>3</sub>                                    | 74                          | 53                     |
| 2                  | P( <i>o</i> -tolyl) <sub>3</sub>                    | 28                          | 13                     |
| 3                  | <sup>t</sup> Bu <sub>2</sub> P( <i>o</i> -biphenyl) | >95                         | 62                     |
| 4                  | <sup>t</sup> Cy <sub>2</sub> P( <i>o</i> -biphenyl) | >95                         | 53                     |
| 5                  | P(C <sub>6</sub> F <sub>5</sub> ) <sub>3</sub>      | 31                          | 29                     |
| 6                  | P <sup>t</sup> Bu <sub>3</sub>                      | 79                          | 54                     |
| 7                  | IPr                                                 | >95                         | 69                     |

<sup>a</sup>Conditions: Au(L)OTf (5 mol %) at 70 °C in CH<sub>2</sub>Cl<sub>2</sub> (sealed tube) (reaction time: 0.5-1.5 h)

### X-Ray Crystallography Data for 3e:

For each determination a suitable crystal was mounted on a Bruker SMART diffractometer equipped with a graphite monochromated Mo<sub>Kα</sub> ( $\lambda = 0.71073 \text{ \AA}$ ) radiation source and a CCD detector and 45 frames of two-dimensional diffraction images were collected and processed to deduce the cell parameters and orientation matrix. The frame data were processed to give structure factors using the program SAINT. [1] The intensity data were corrected for Lorentz and polarization effects. The structures were solved by a combination of direct and difference Fourier methods provided by the program package SHELXTL, [2] and refined using a full matrix least square against  $F^2$  for all data. All non-H atoms were refined anisotropically. All hydrogen atoms were included in calculated positions with isotropic thermal parameters 1.2 times those of attached atoms. (Reference: [1] Bruker, *SMART, SAINT and XPREP: Area Detector Control and Integration Software Ver. 5.054*; Bruker Analytical X-ray Instruments: Madison, Wisconsin, 2001. [2] Bruker, *SHELXTL: Structure Determination Programs, Ver. 6.12*; Bruker Analytical X-ray Instruments: Madison, Wisconsin, 2000.)

Crystallographic data for compound **3e**: Triclinic, space group  $P-1$ ,  $a = 12.3395(5) \text{ \AA}$ ,  $b = 16.6385(9) \text{ \AA}$ ,  $c = 16.9325(7) \text{ \AA}$ ,  $\alpha = 102.905(3)^\circ$ ,  $\beta = 101.820(2)^\circ$ ,  $\gamma = 111.464(2)^\circ$ ,  $V = 2992.1(2) \text{ \AA}^3$ ,  $T = 146 \text{ K}$ ,  $Z = 8$ , Mo<sub>Kα</sub> radiation, graphite monochromator, scan width  $0.3^\circ$  in  $\omega$ , 10 s irradiation time per measurement reflections, 12311 measurements, 24963 measured reflections, 12311 independent reflections, 766 parameters, GOF = 1.068,  $R_1(I > 2\sigma(I)) = 0.0715$ ,  $wR_2 = 0.1878$ .

**Table S3.** Selected bond lengths [Å] and angles [°] for **3e**.

|                |            |
|----------------|------------|
| O(1)-C(15)     | 1.236(3)   |
| N(1)-C(1)      | 1.337(3)   |
| N(1)-C(8)      | 1.381(3)   |
| C(1)-C(2)      | 1.417(3)   |
| C(1)-C(9)      | 1.467(3)   |
| C(2)-C(3)      | 1.410(3)   |
| C(2)-C(7)      | 1.434(3)   |
| C(3)-C(4)      | 1.369(3)   |
| C(4)-C(5)      | 1.413(3)   |
| C(5)-C(6)      | 1.365(3)   |
| C(6)-C(7)      | 1.417(3)   |
| C(7)-C(8)      | 1.411(3)   |
| C(8)-C(15)     | 1.440(3)   |
| C(9)-C(10)     | 1.389(3)   |
| C(9)-C(14)     | 1.402(3)   |
| C(10)-C(11)    | 1.387(3)   |
| C(11)-C(12)    | 1.383(4)   |
| C(12)-C(13)    | 1.381(4)   |
| C(13)-C(14)    | 1.386(3)   |
| C(15)-C(16)    | 1.515(3)   |
| C(16)-C(17)    | 1.518(3)   |
| C(17)-C(18)    | 1.524(3)   |
| C(18)-C(19)    | 1.524(3)   |
| C(1)-N(1)-C(8) | 112.26(18) |
| N(1)-C(1)-C(2) | 107.47(18) |
| N(1)-C(1)-C(9) | 123.65(19) |
| C(2)-C(1)-C(9) | 128.8(2)   |
| C(3)-C(2)-C(1) | 131.9(2)   |
| C(3)-C(2)-C(7) | 121.21(19) |
| C(1)-C(2)-C(7) | 106.85(19) |
| C(4)-C(3)-C(2) | 118.5(2)   |
| C(3)-C(4)-C(5) | 120.8(2)   |
| C(6)-C(5)-C(4) | 121.9(2)   |

|                   |            |
|-------------------|------------|
| C(5)-C(6)-C(7)    | 119.3(2)   |
| C(8)-C(7)-C(6)    | 134.8(2)   |
| C(8)-C(7)-C(2)    | 106.96(18) |
| C(6)-C(7)-C(2)    | 118.24(19) |
| N(1)-C(8)-C(7)    | 106.45(18) |
| N(1)-C(8)-C(15)   | 119.66(19) |
| C(7)-C(8)-C(15)   | 133.9(2)   |
| C(10)-C(9)-C(14)  | 118.8(2)   |
| C(10)-C(9)-C(1)   | 121.1(2)   |
| C(14)-C(9)-C(1)   | 120.1(2)   |
| C(11)-C(10)-C(9)  | 120.4(2)   |
| C(12)-C(11)-C(10) | 120.6(2)   |
| C(13)-C(12)-C(11) | 119.6(2)   |
| C(12)-C(13)-C(14) | 120.4(3)   |
| C(13)-C(14)-C(9)  | 120.3(2)   |
| O(1)-C(15)-C(8)   | 121.8(2)   |
| O(1)-C(15)-C(16)  | 121.2(2)   |
| C(8)-C(15)-C(16)  | 117.06(19) |
| C(15)-C(16)-C(17) | 115.31(18) |
| C(16)-C(17)-C(18) | 111.35(18) |
| C(19)-C(18)-C(17) | 113.7(2)   |

---

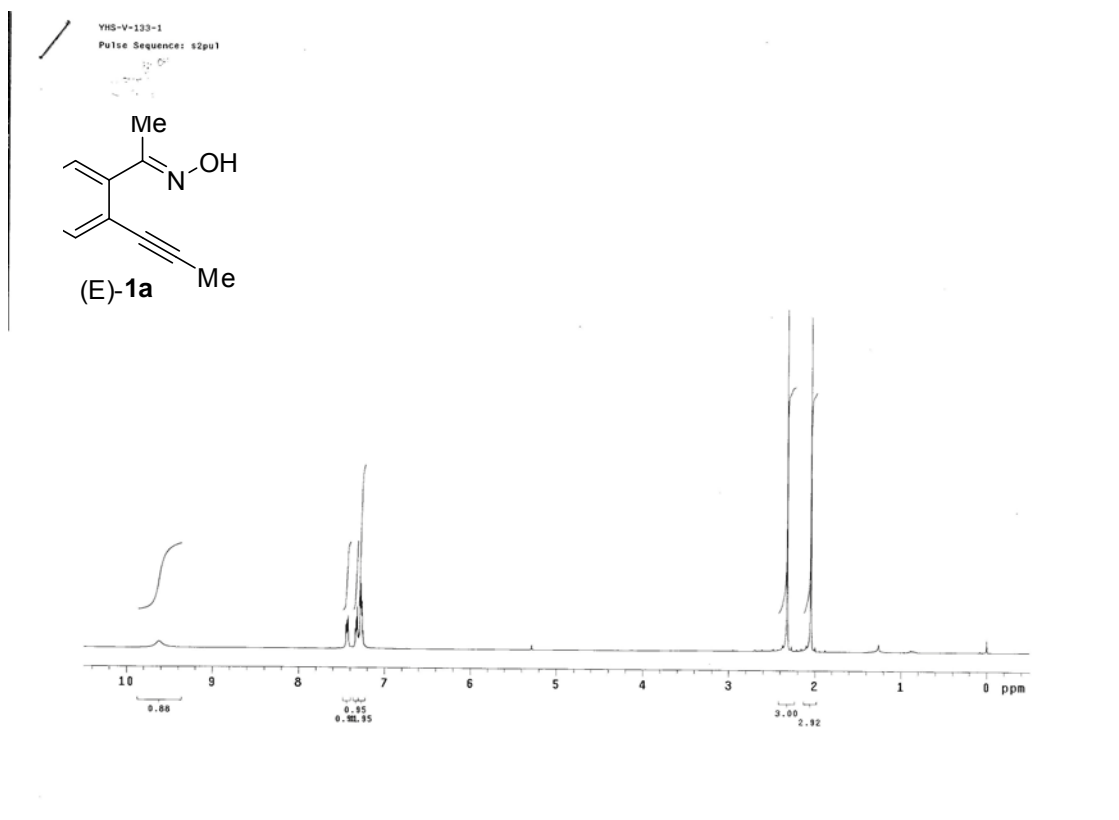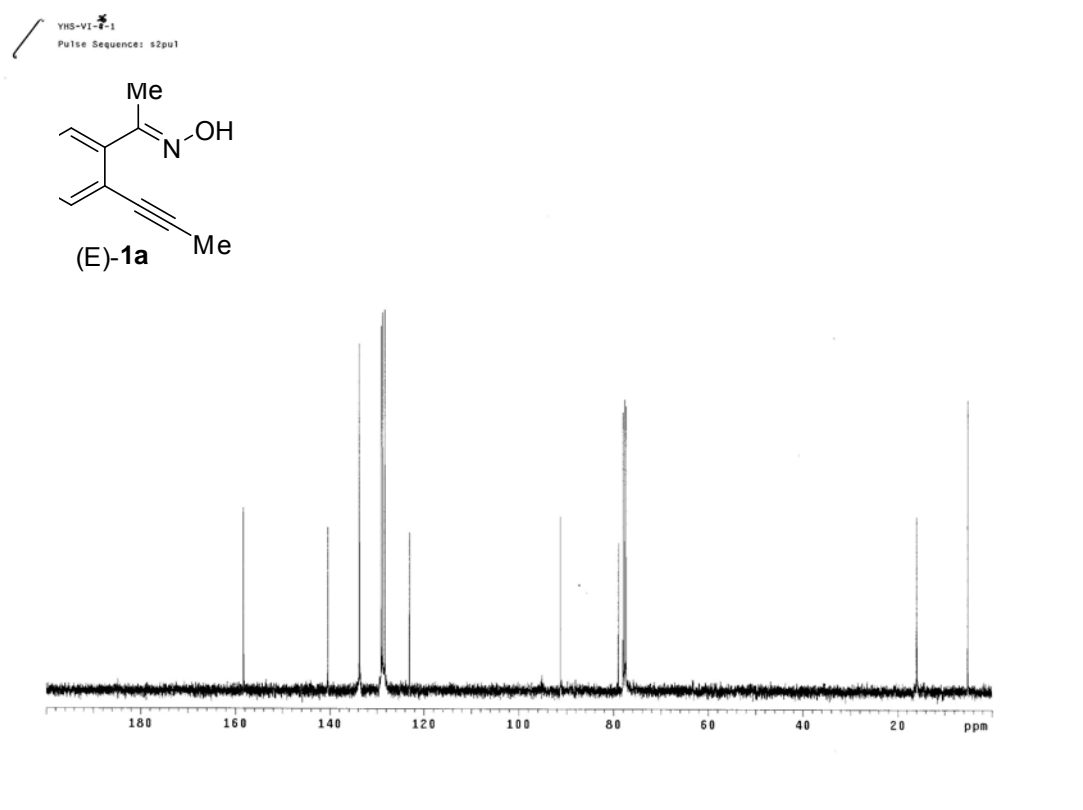

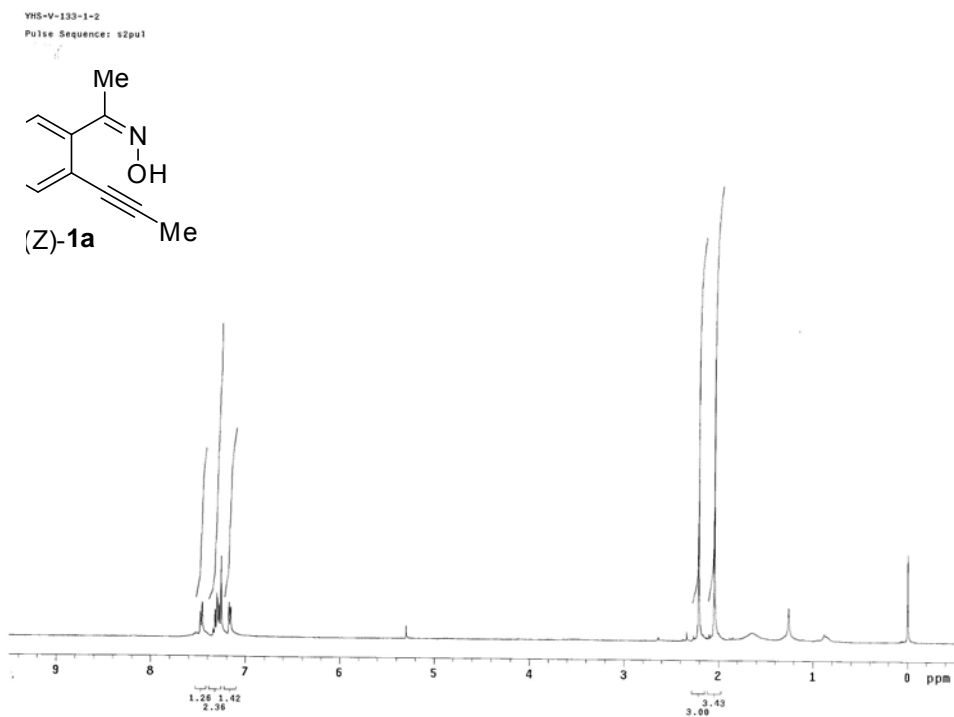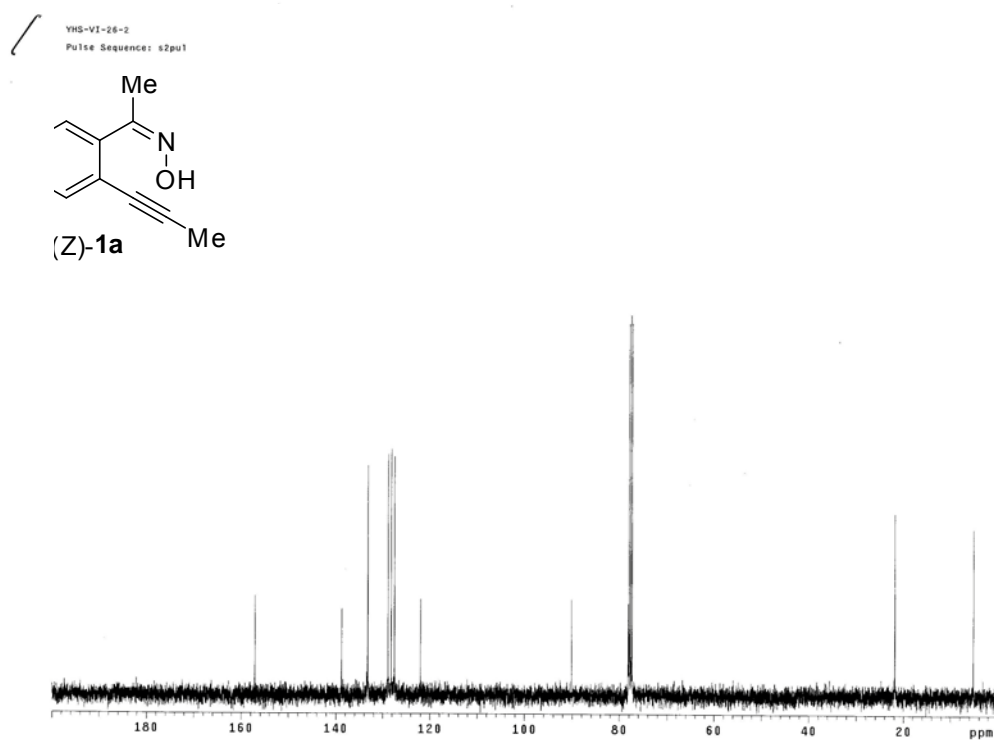



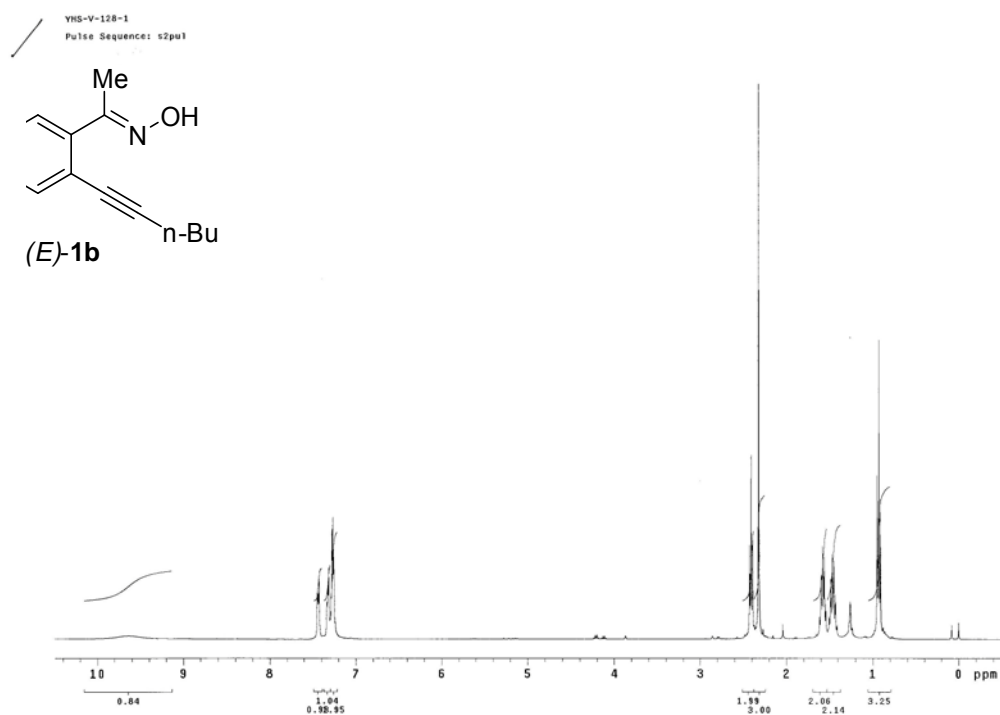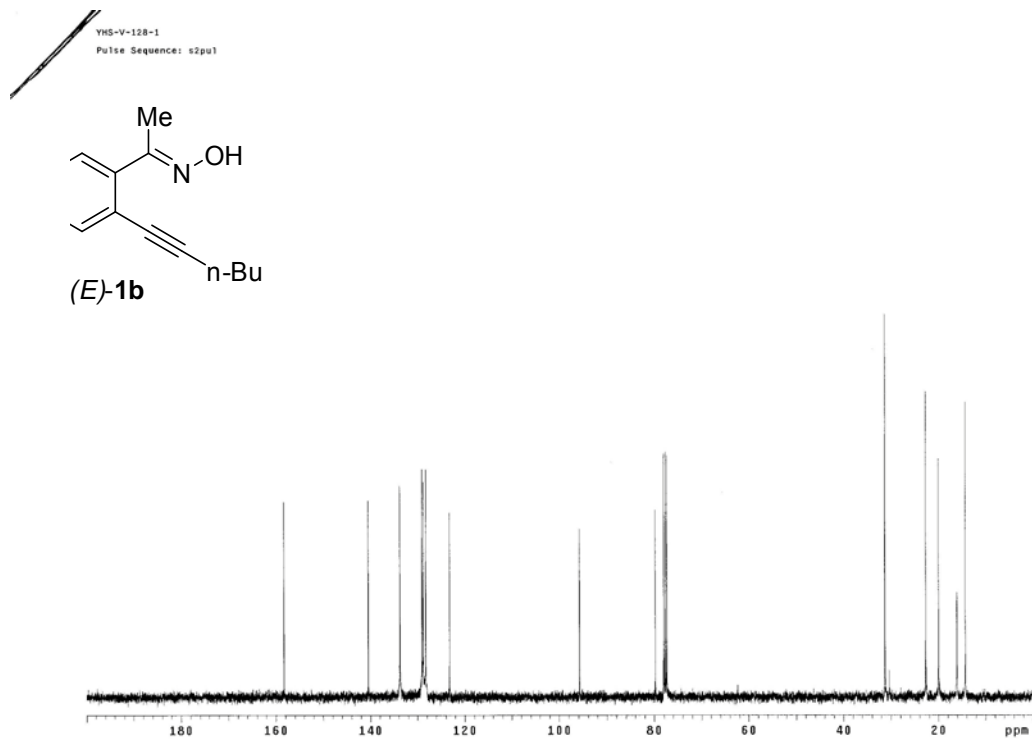

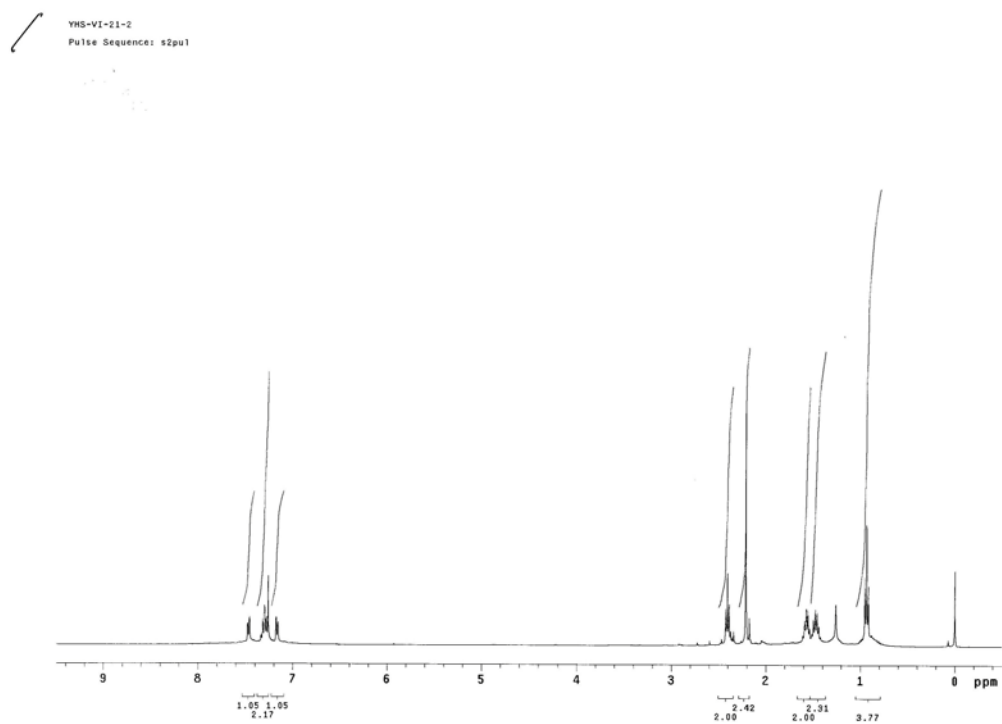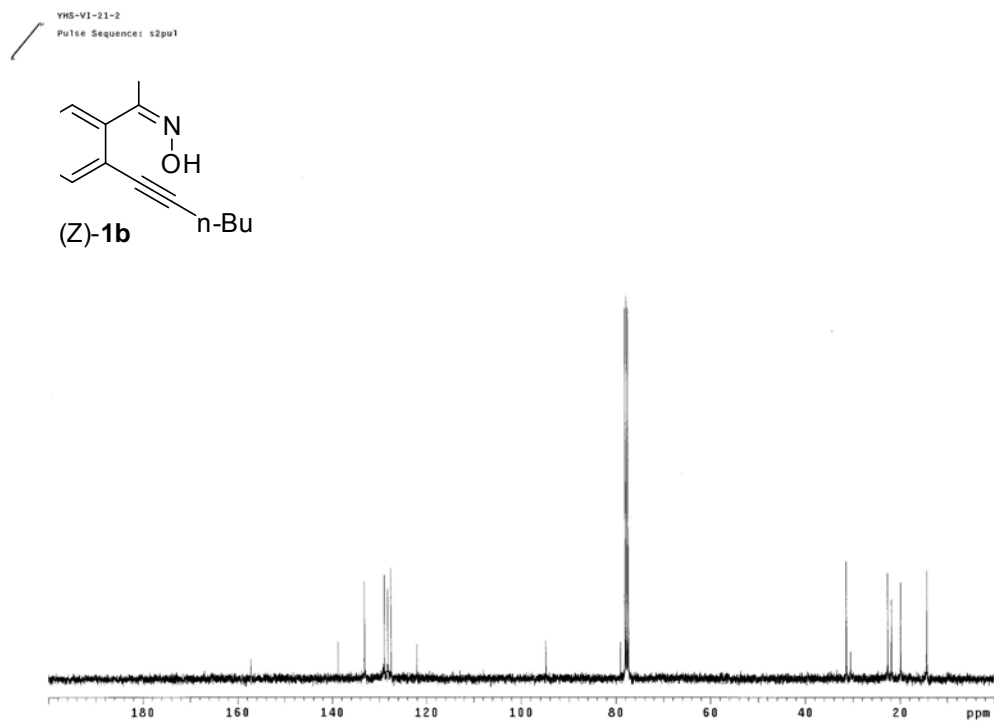

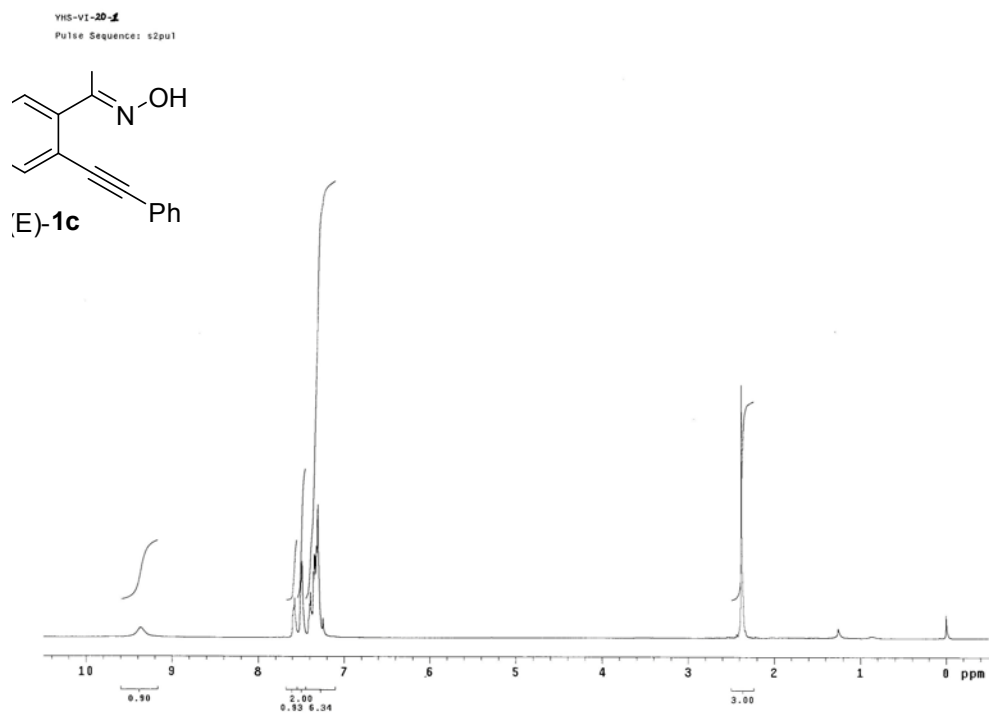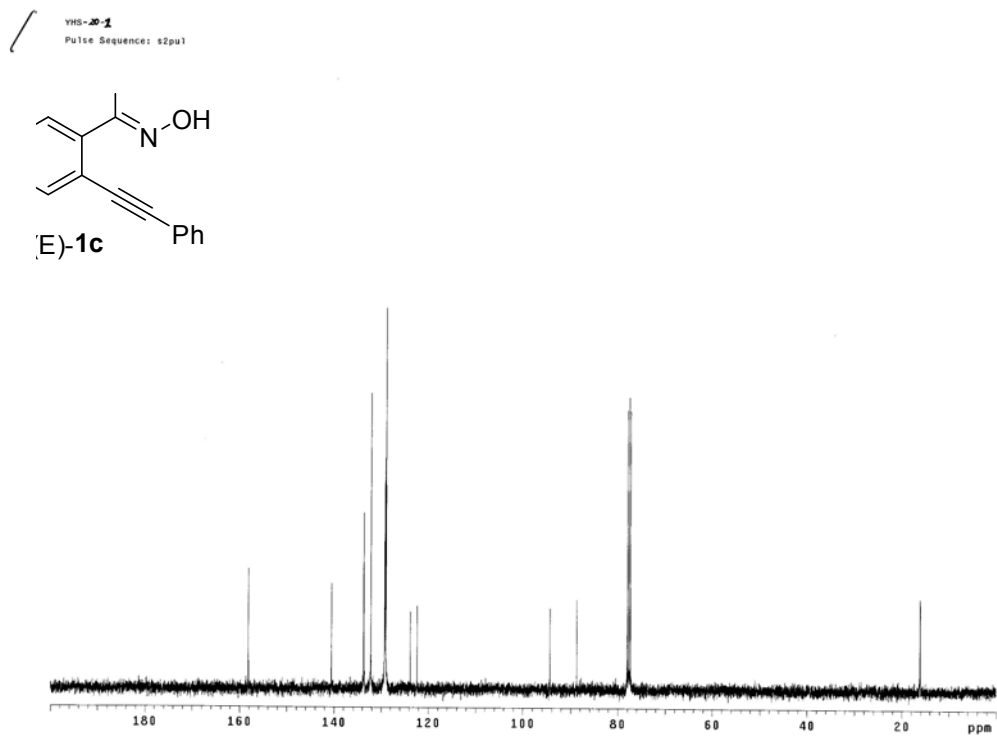

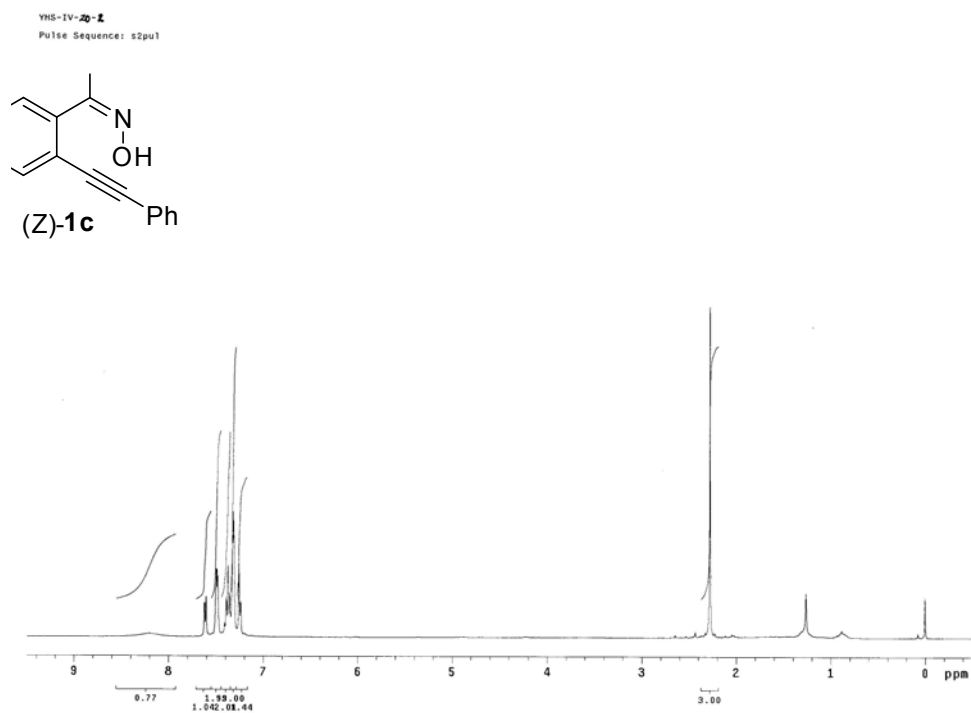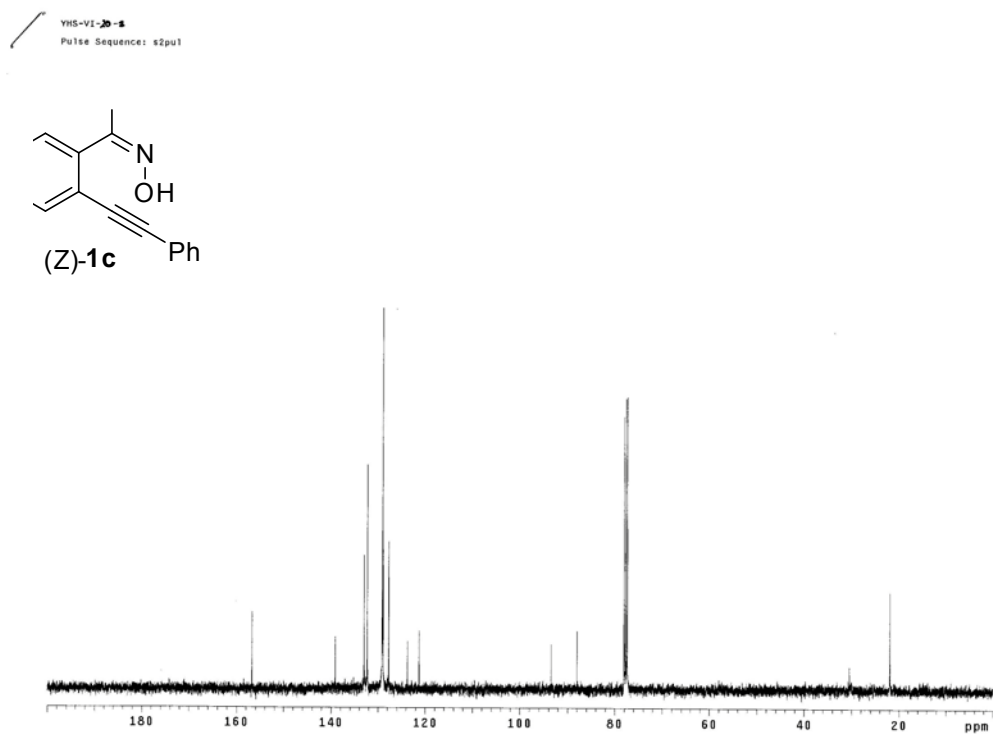

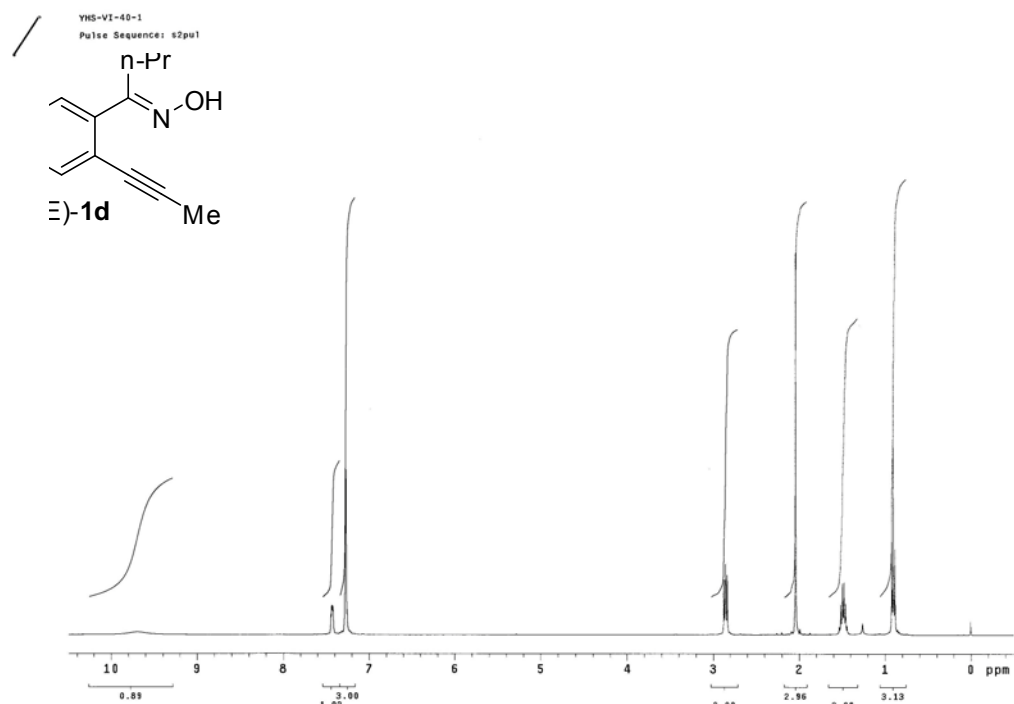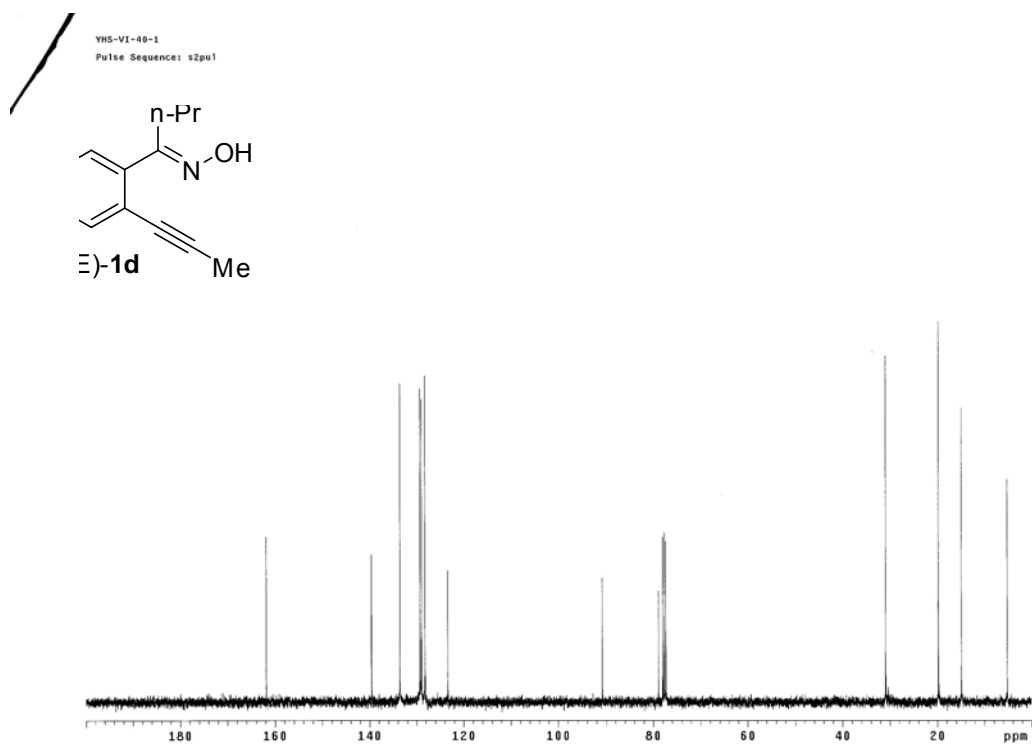

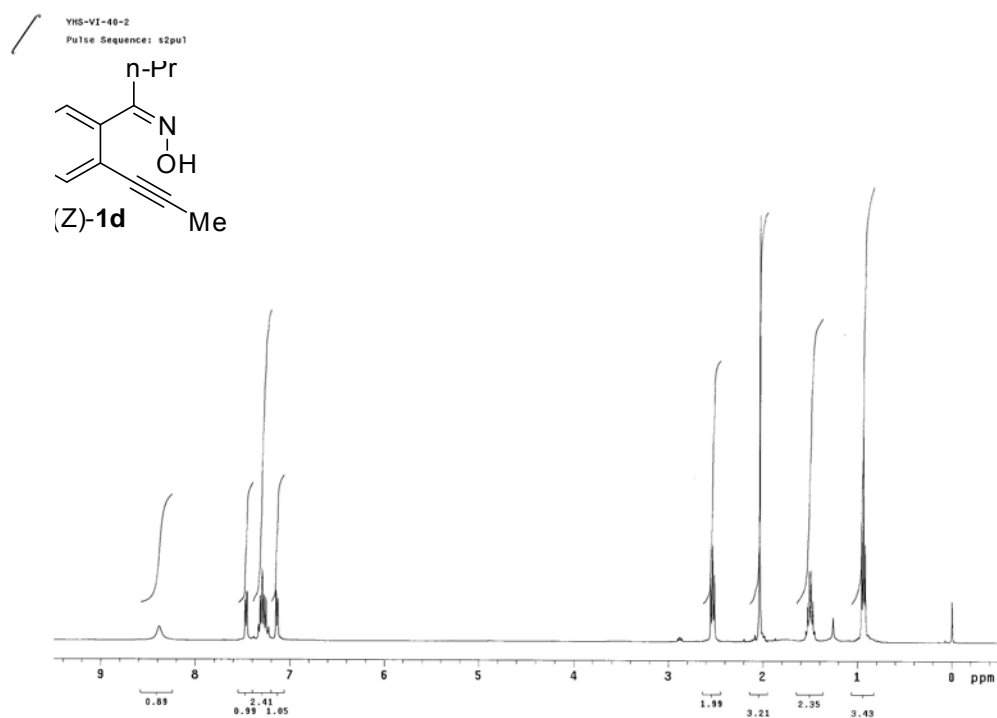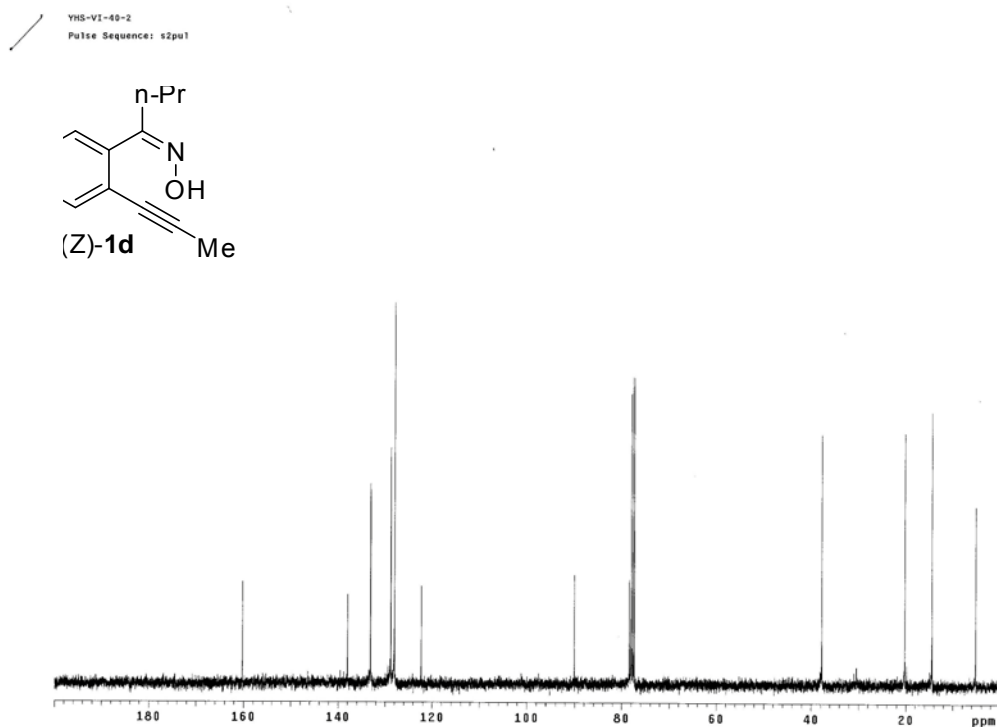

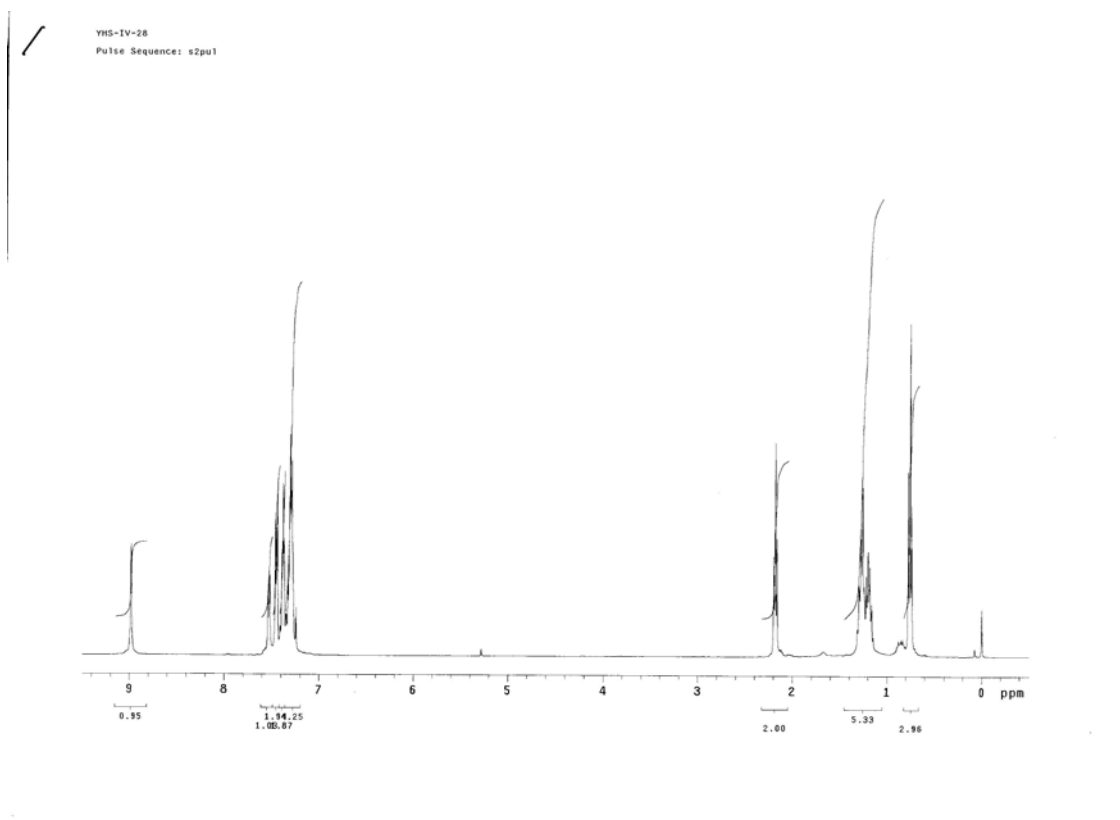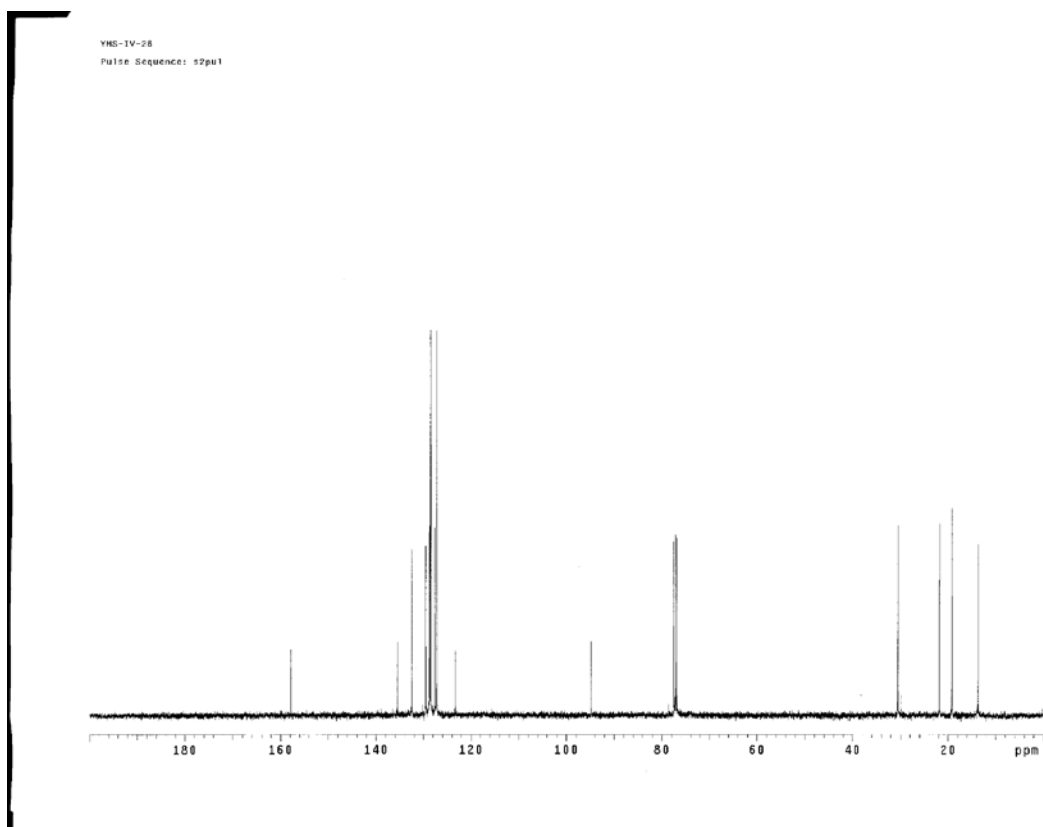

YHS-VI-89  
Pulse Sequence: s2pu1

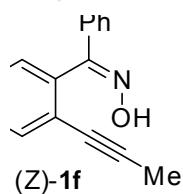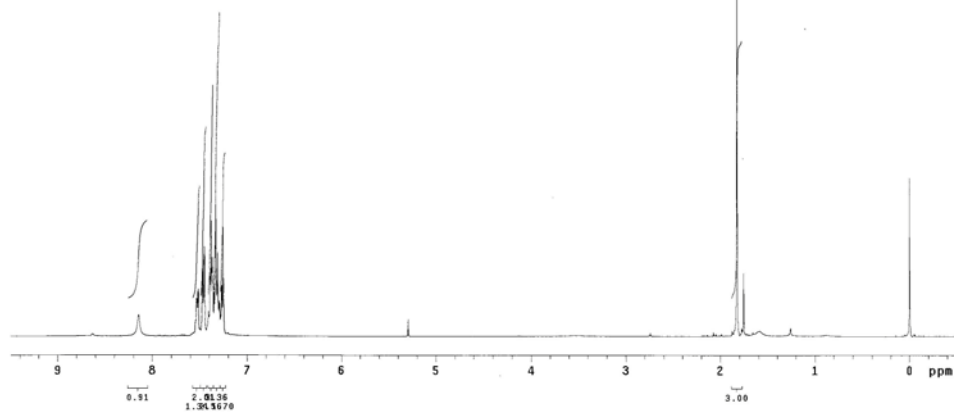

YHS-VI-8-2  
Pulse Sequence: s2pu1

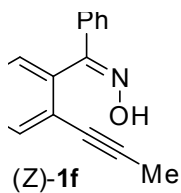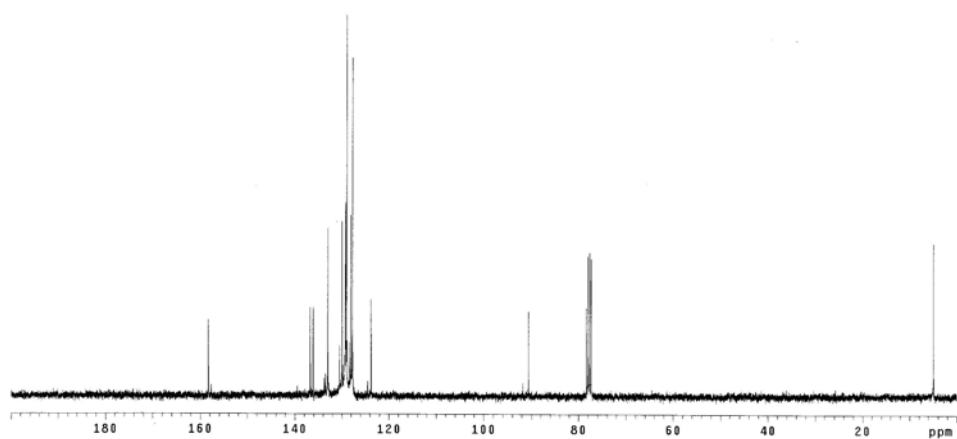



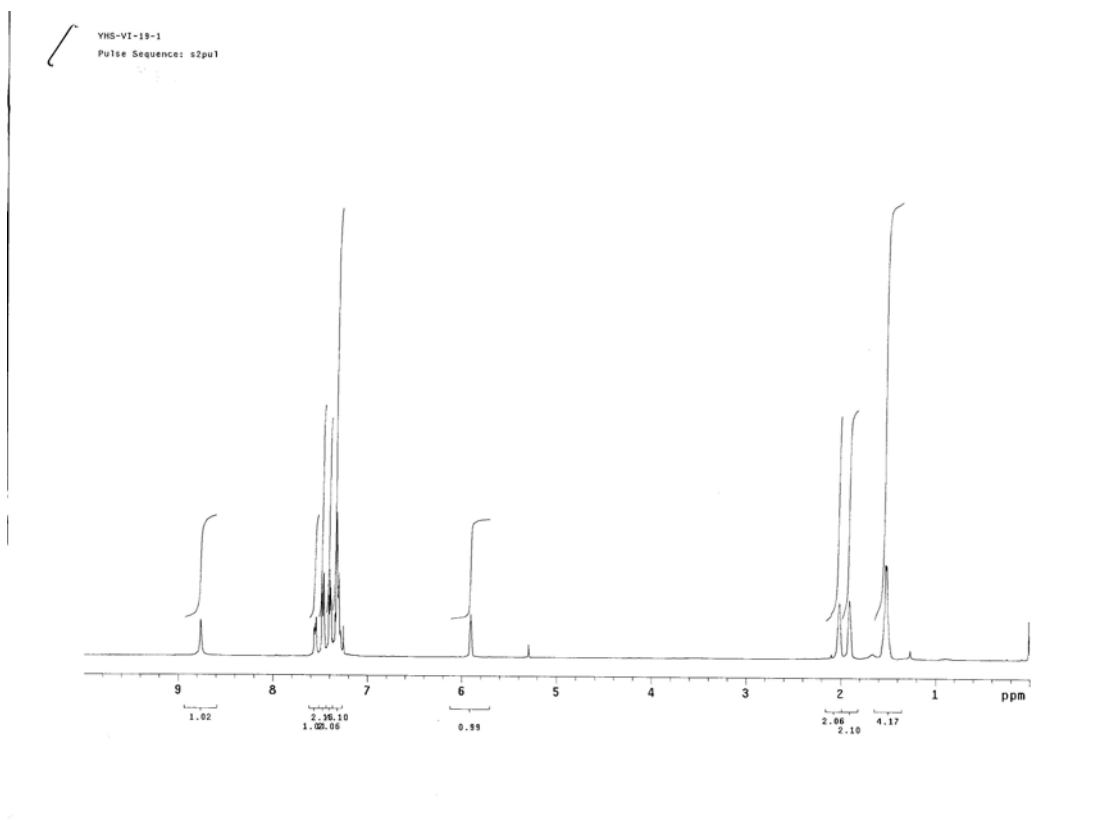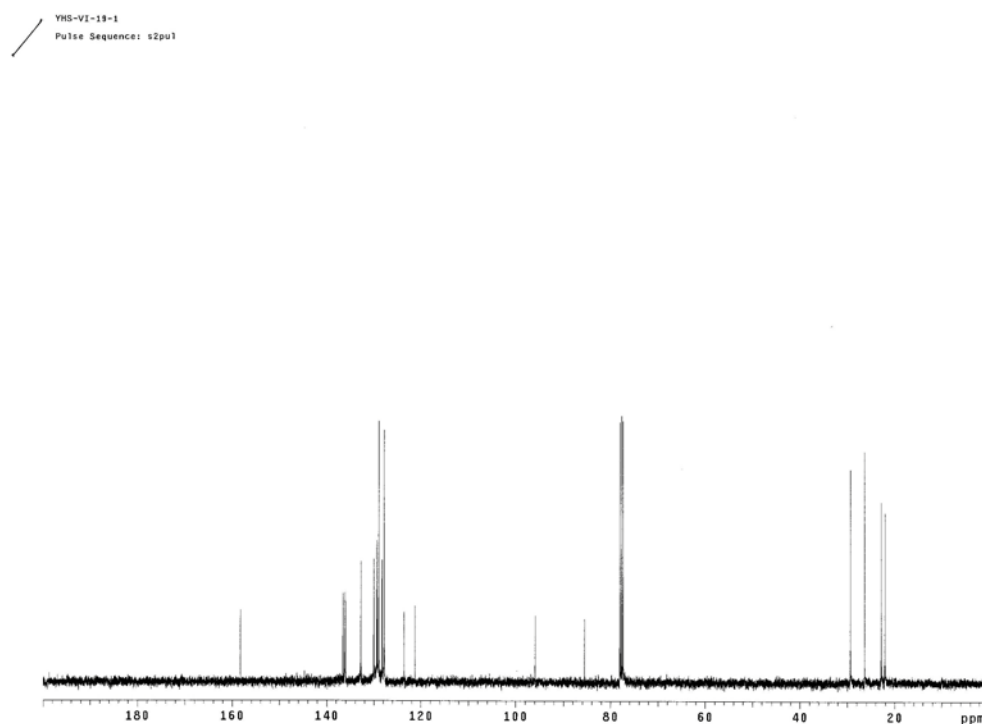

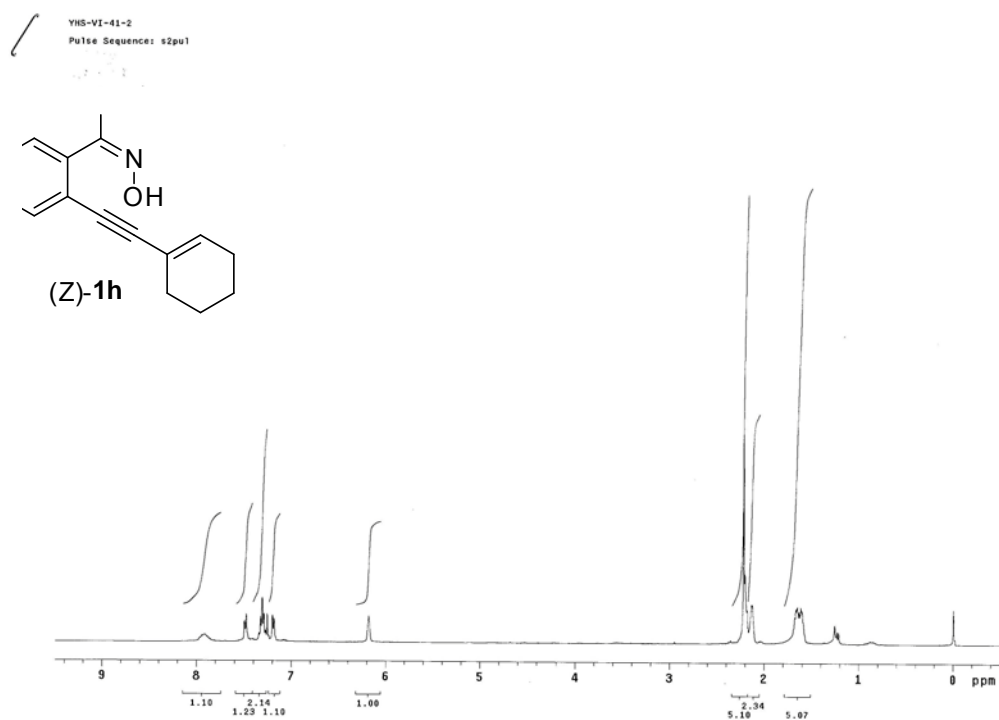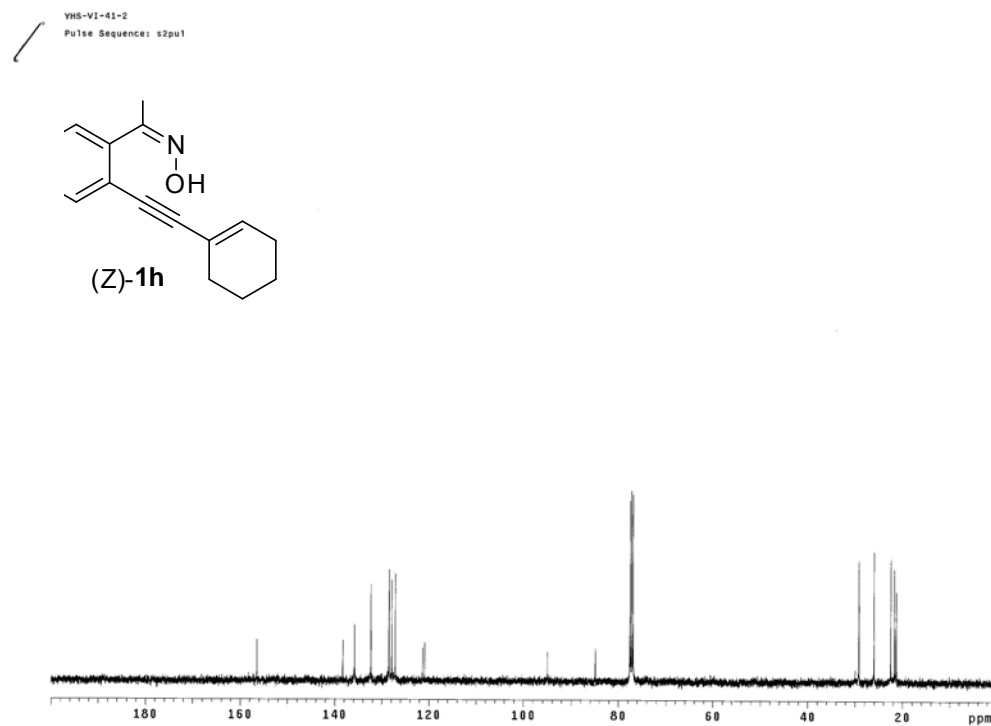

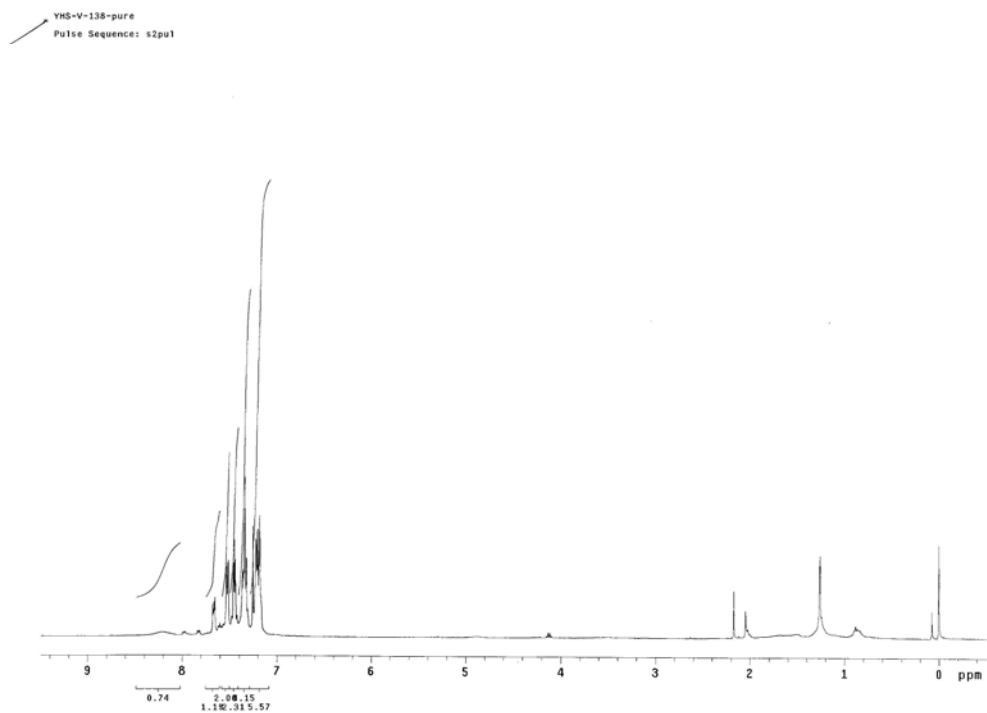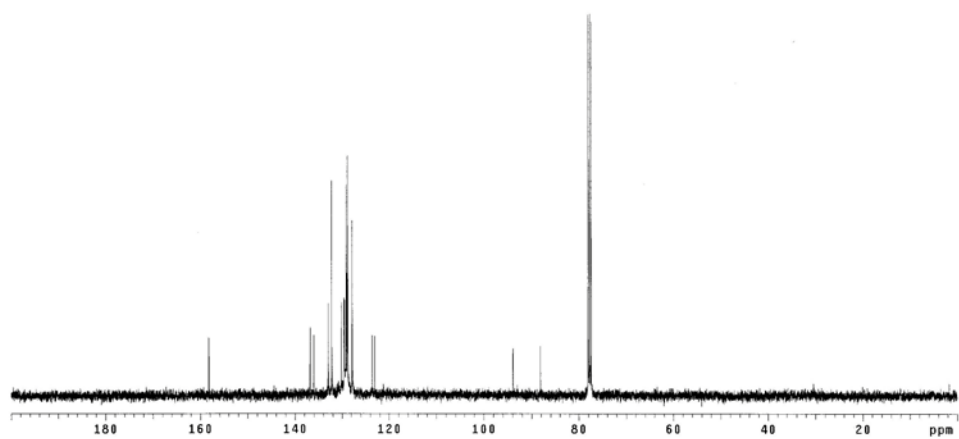

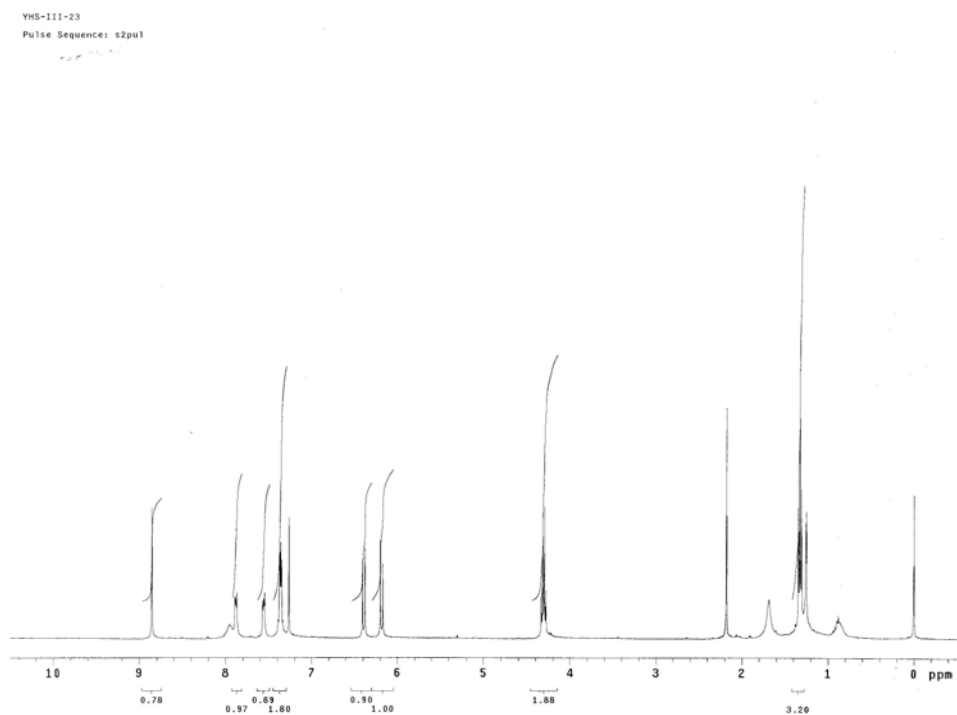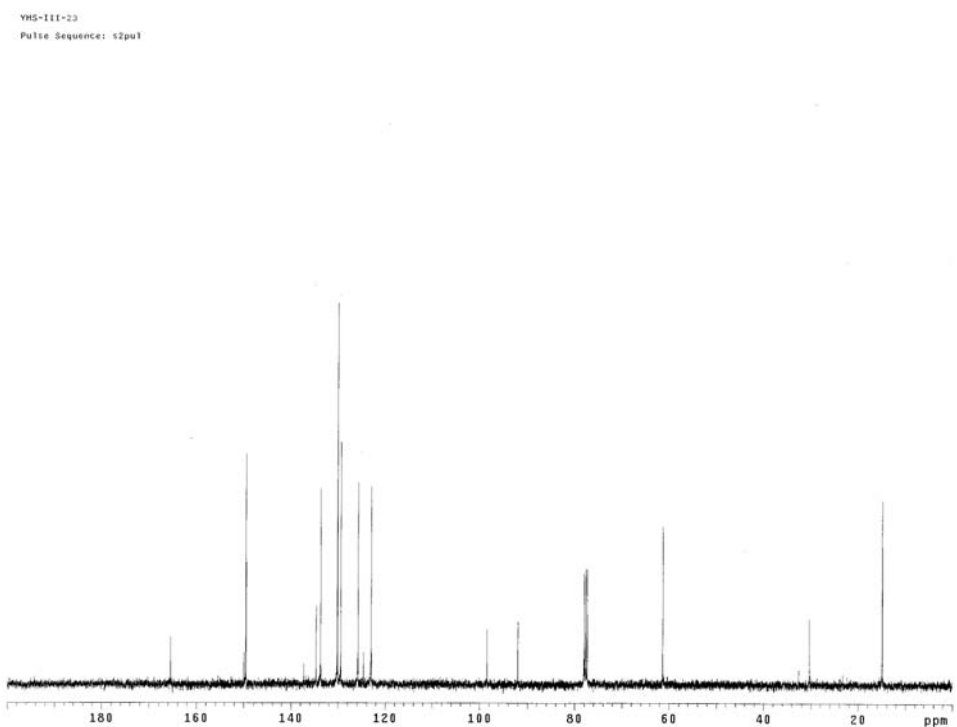

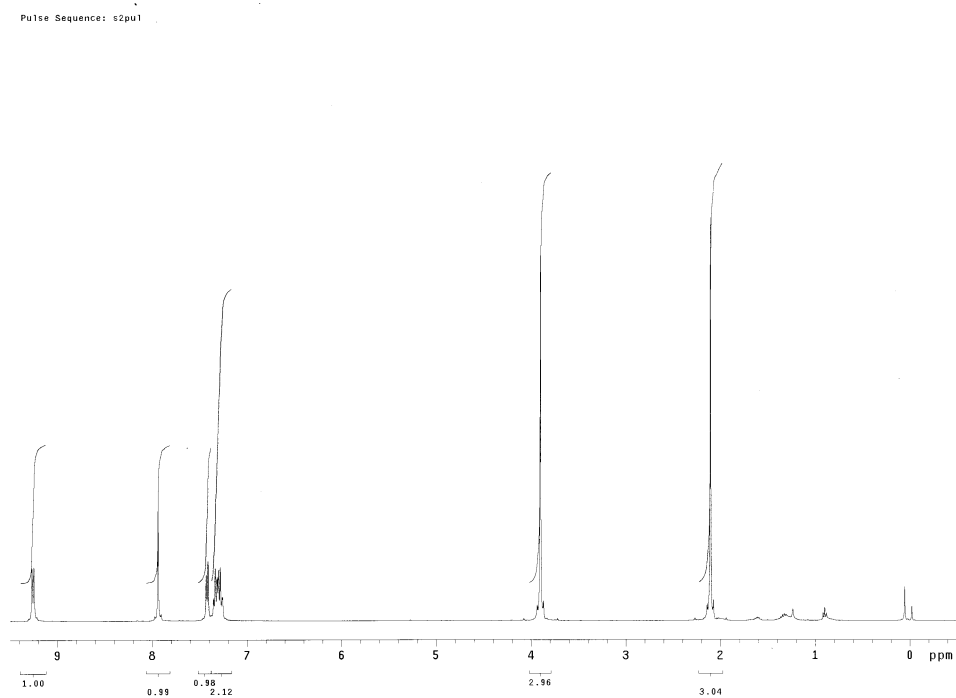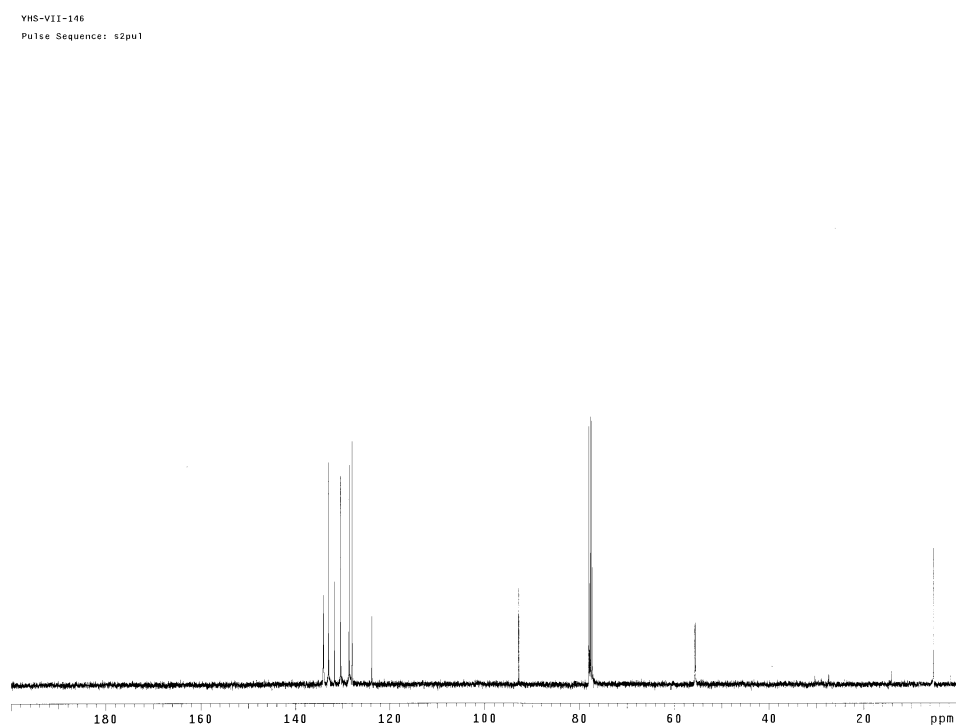

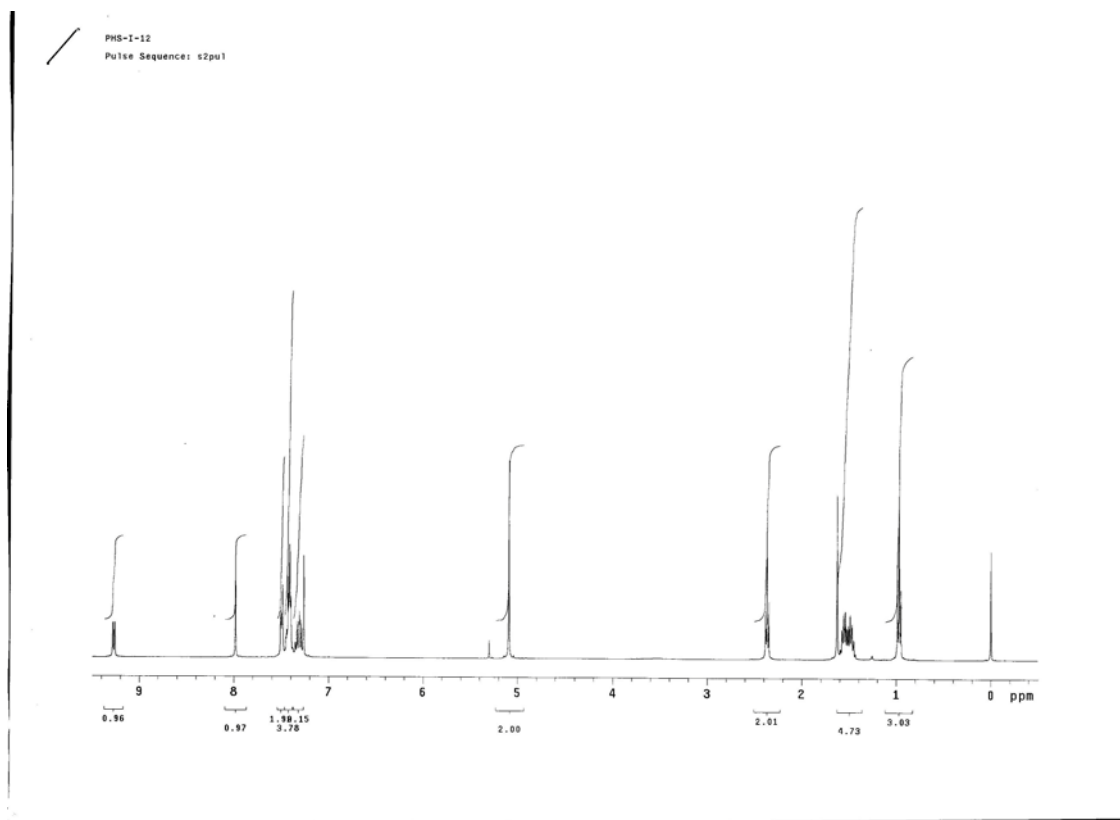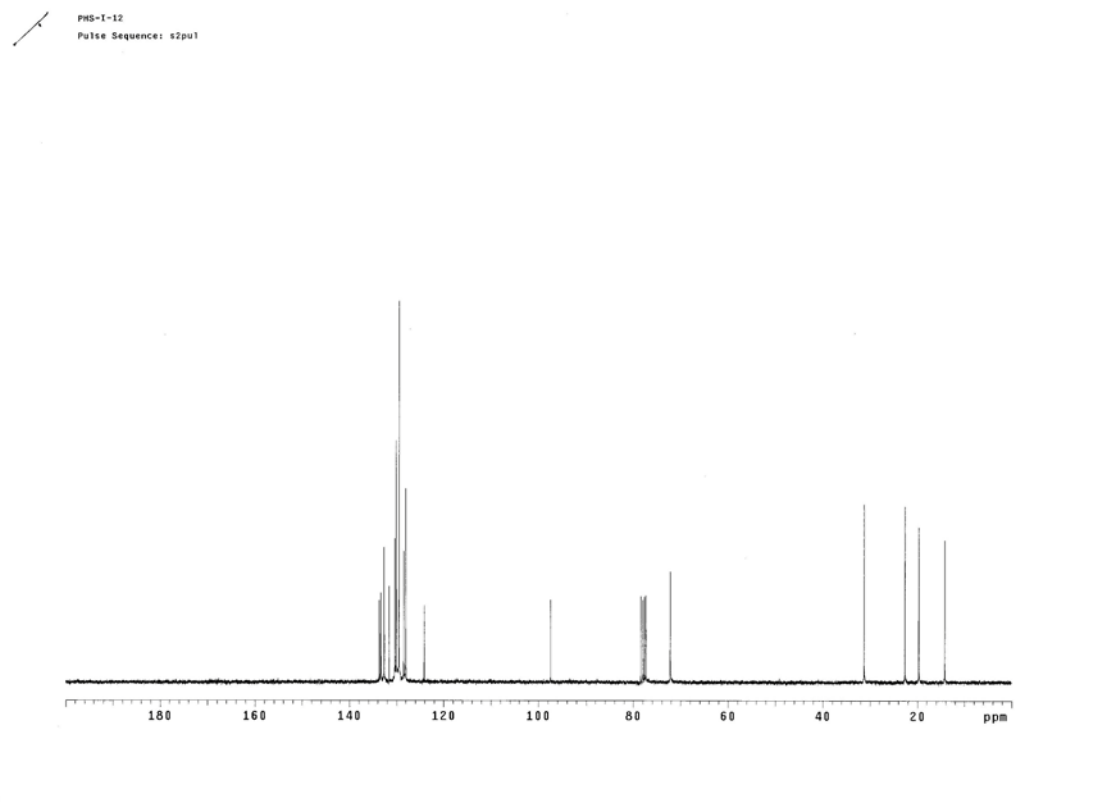

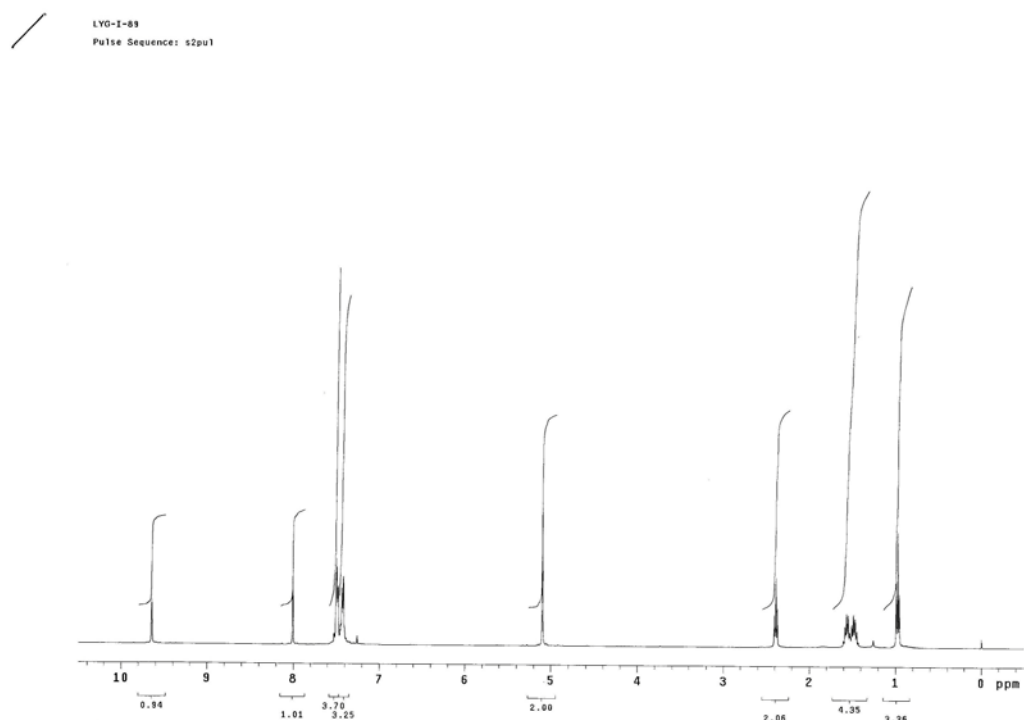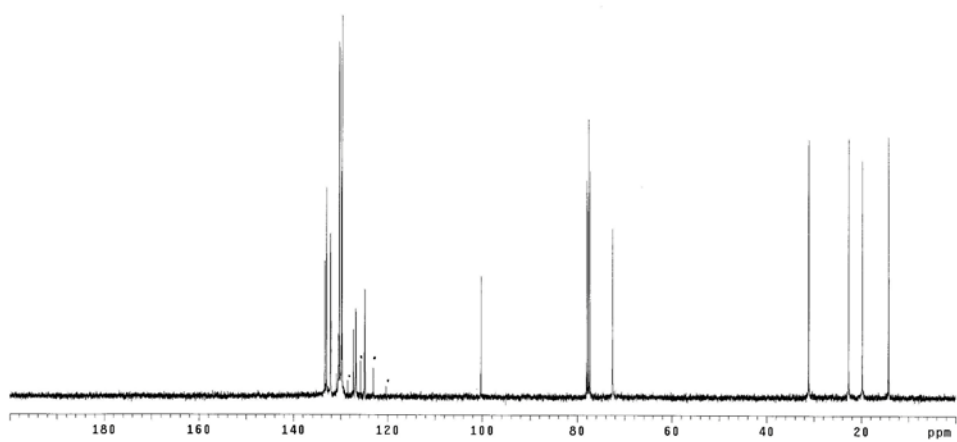

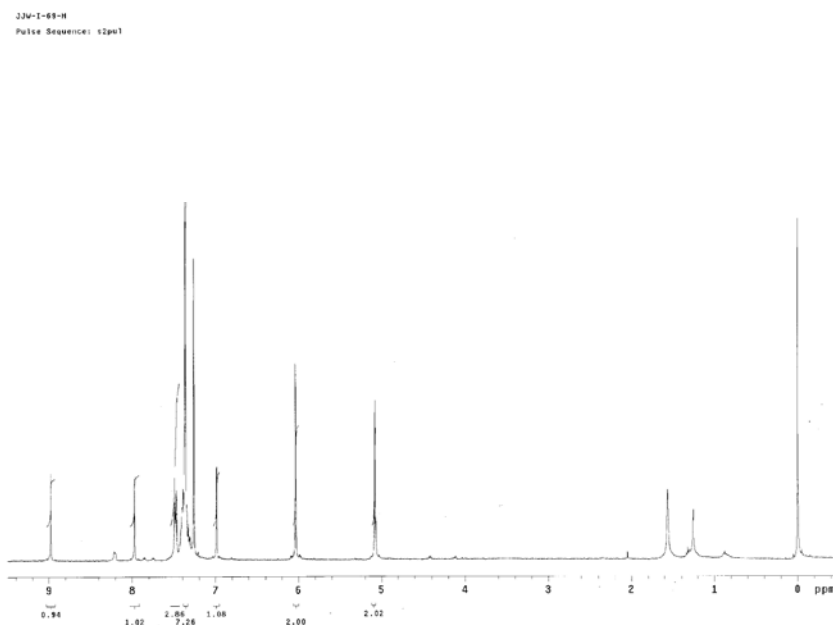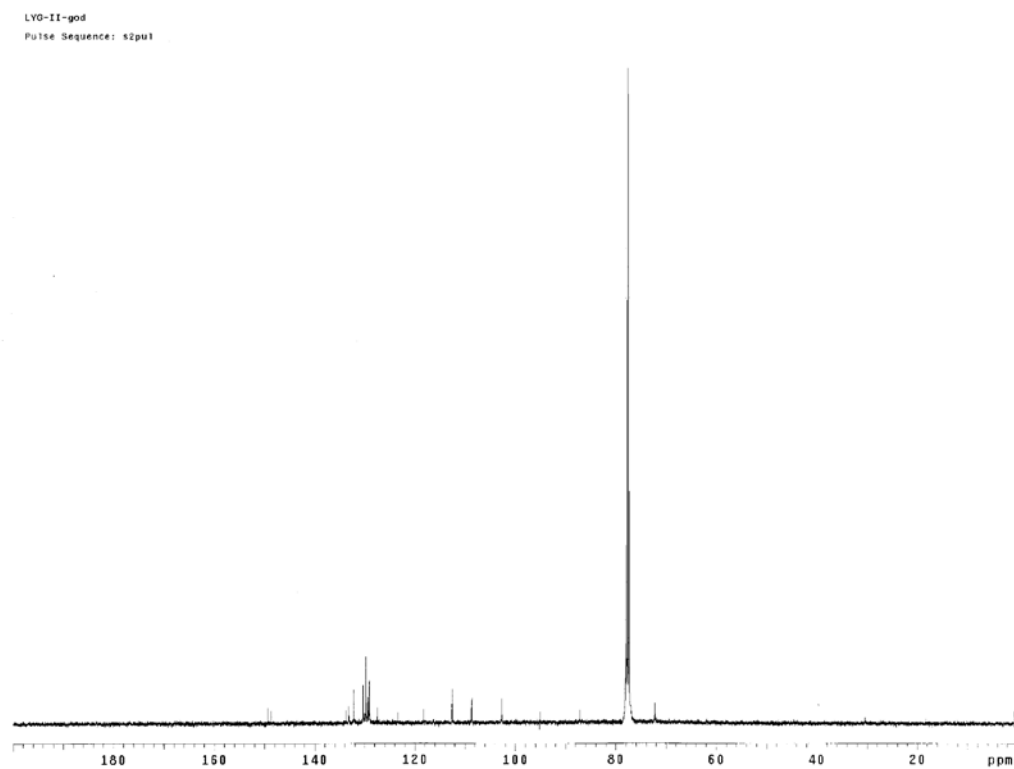



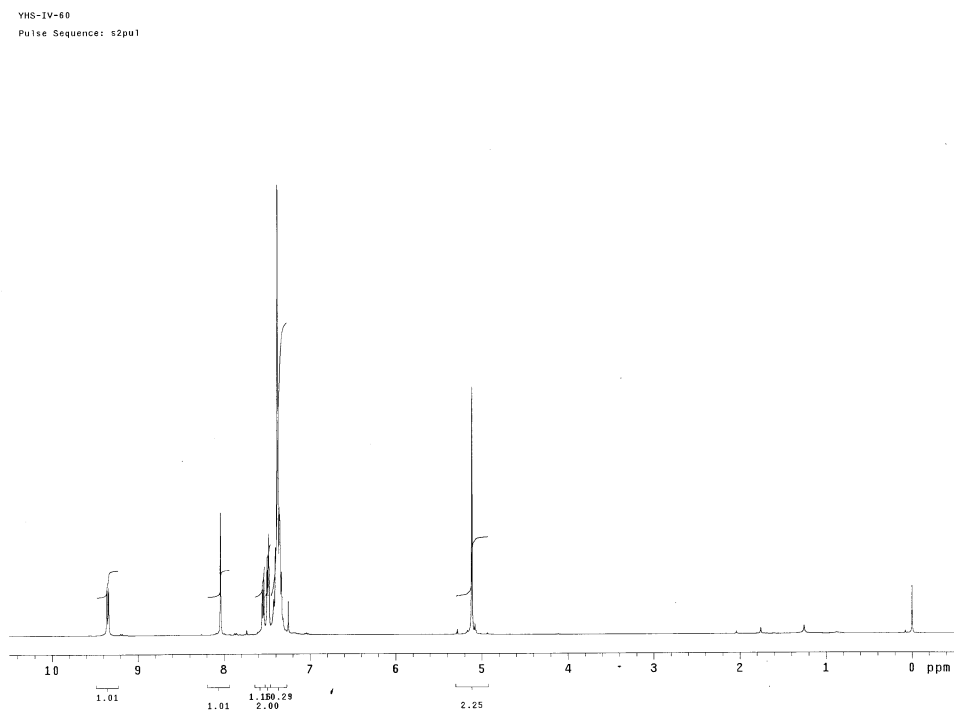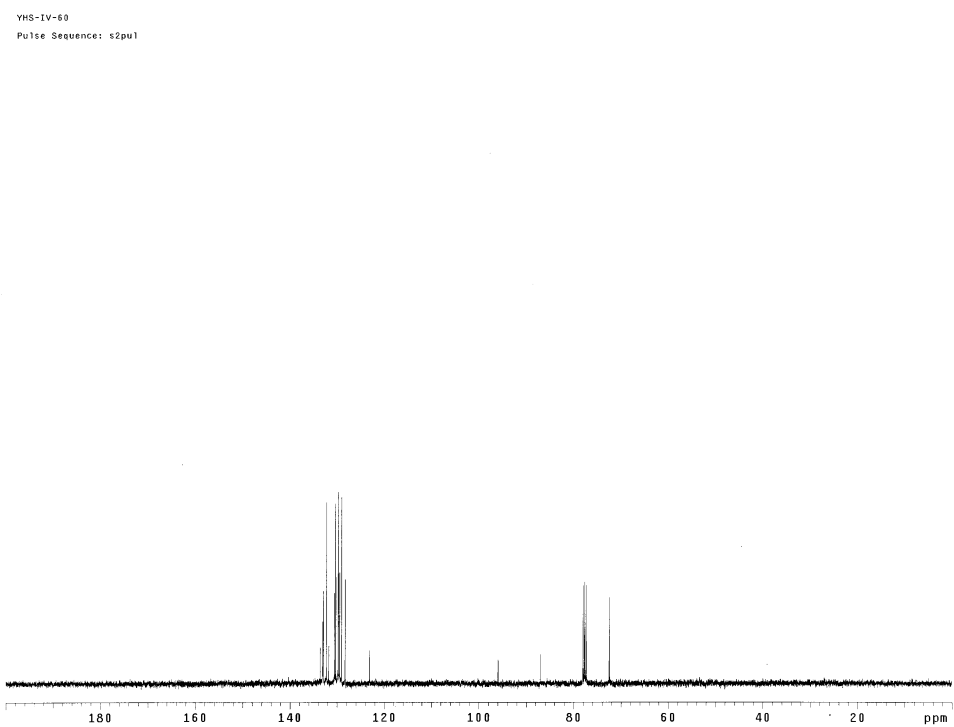

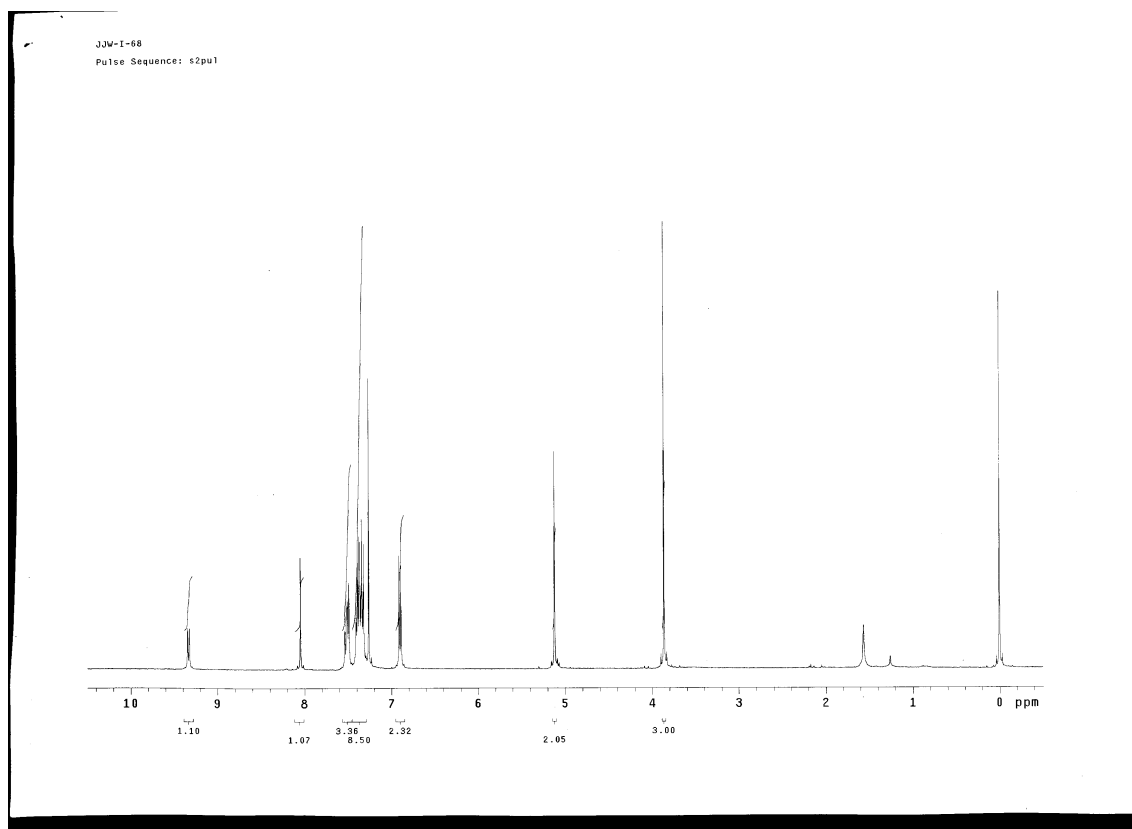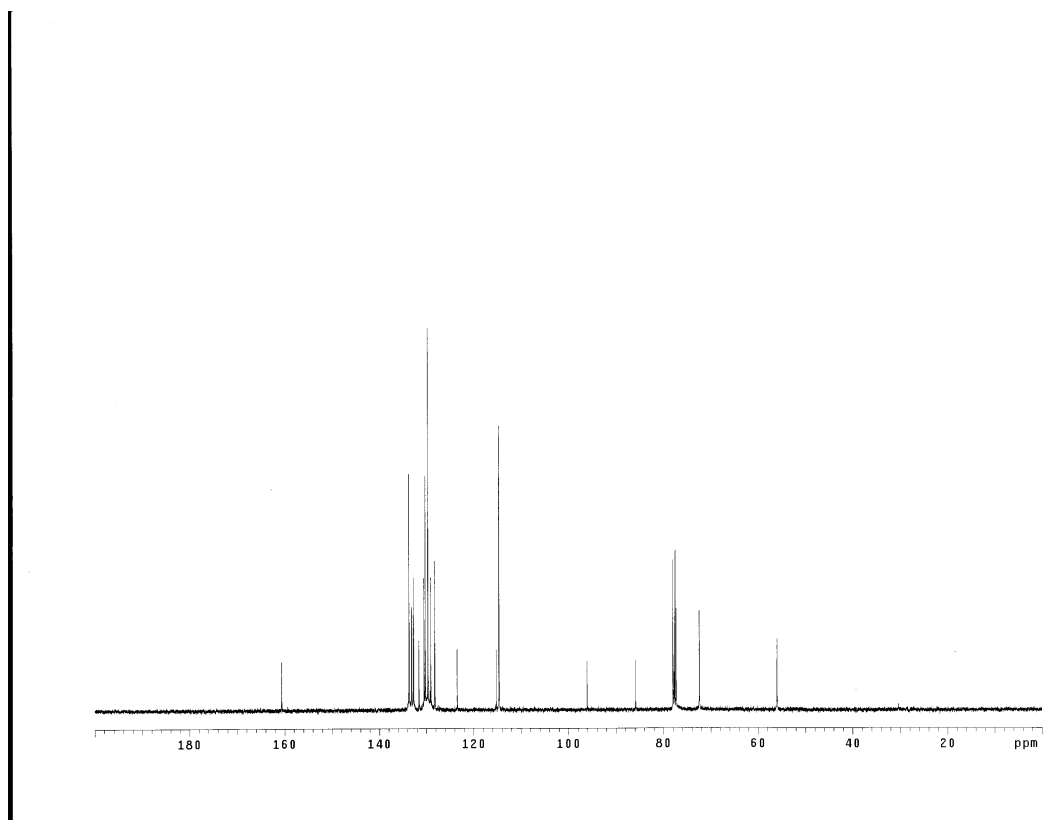

LYG-II-47-H  
Pulse Sequence: s2pu1

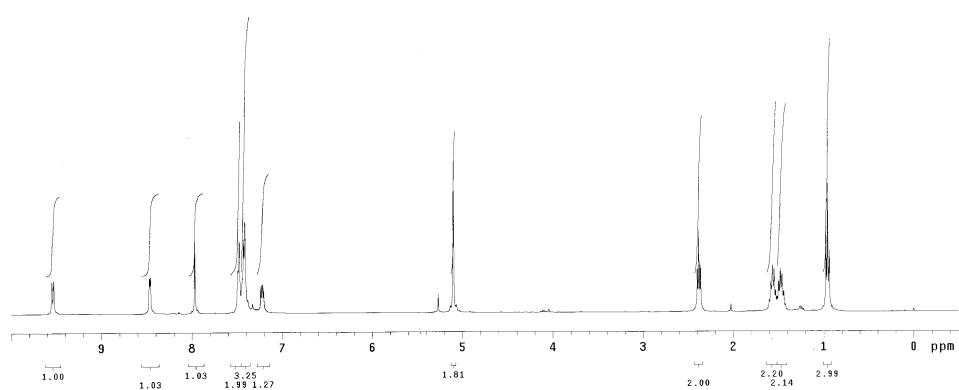

LYG-II-47-C13  
Pulse Sequence: s2pu1

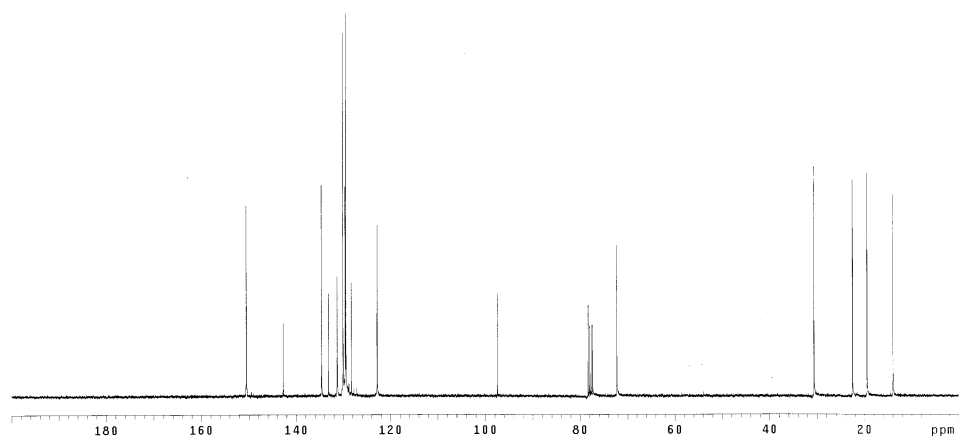

LYG-1-98-H  
Pulse Sequence: zgpg30

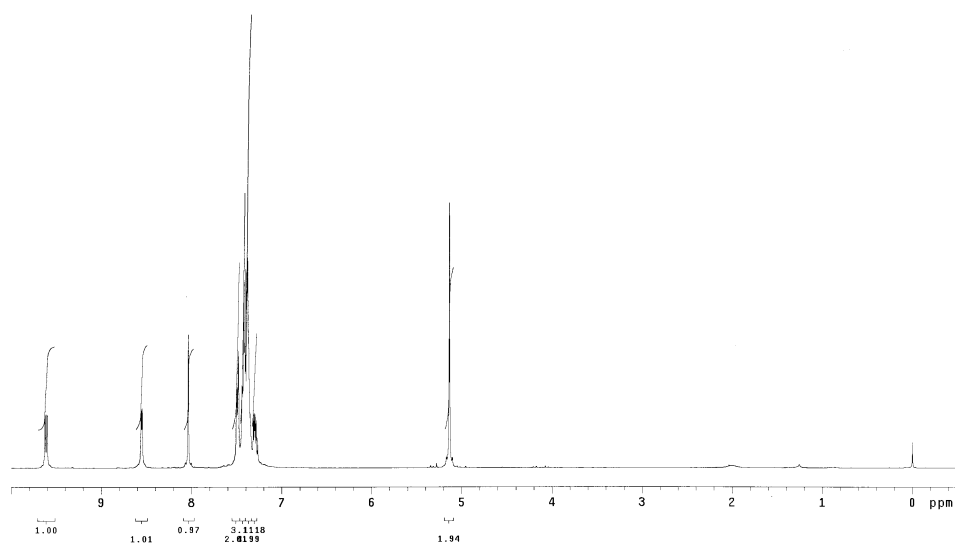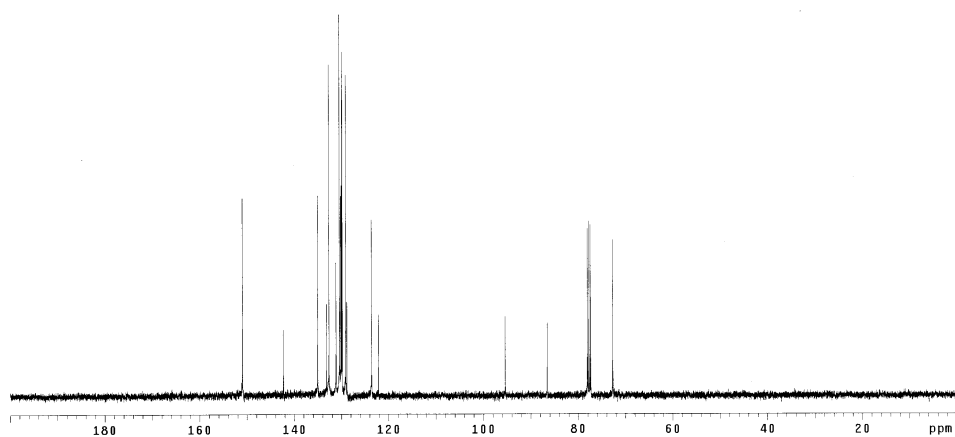

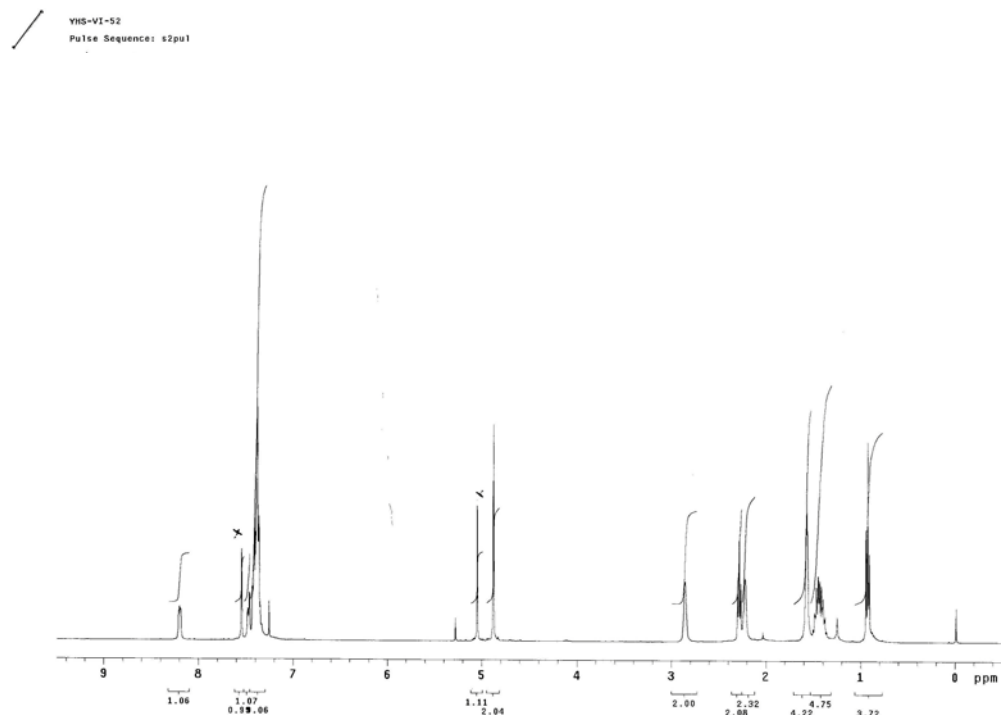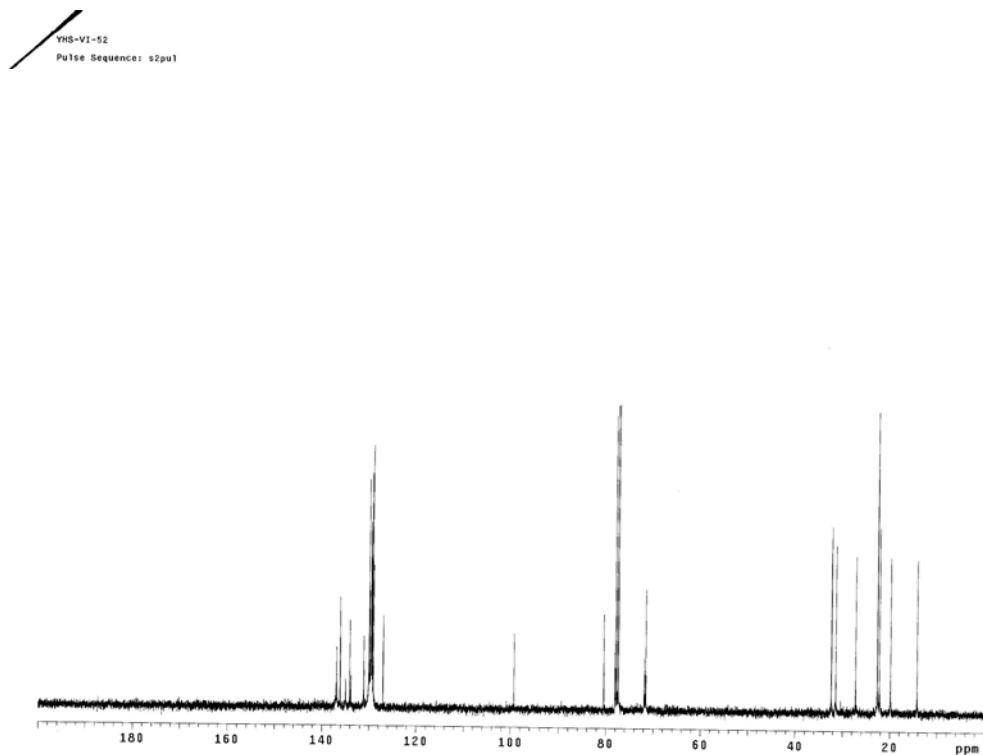

YHS-V-143-2/43  
Pulse Sequence: s2pu1

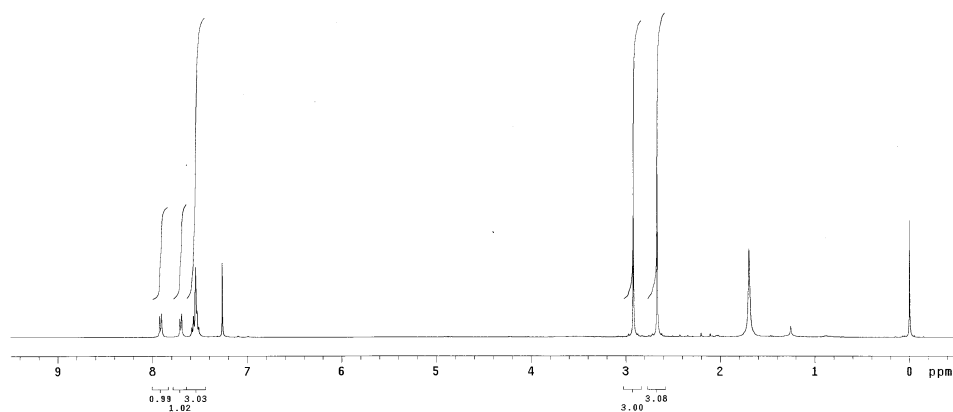

YHS-V-143  
Pulse Sequence: s2pu1

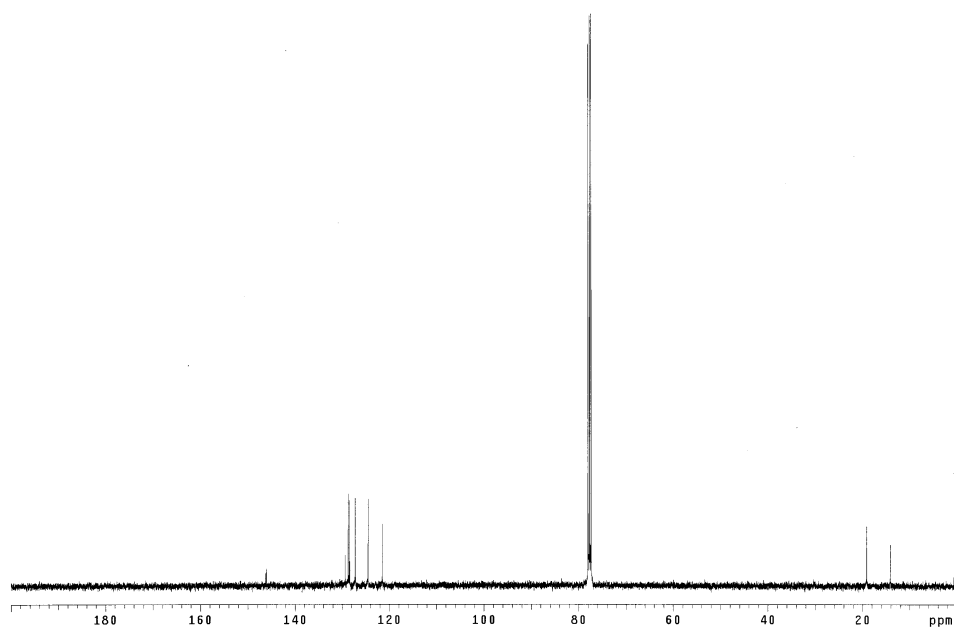

YHS-VI-96-2  
Pulse Sequence: s2pu1

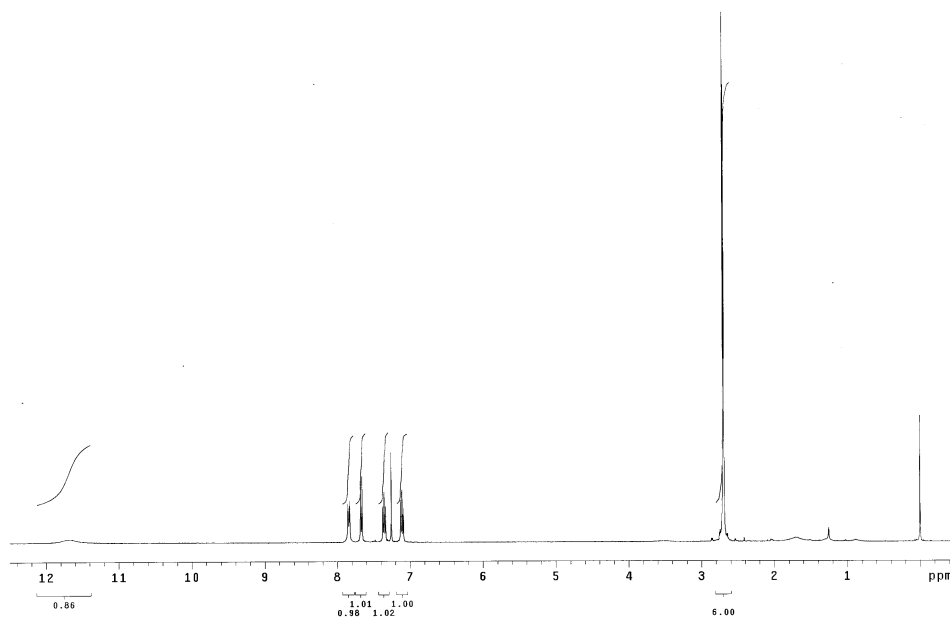

YHS-VI-96-2  
Pulse Sequence: s2pu1

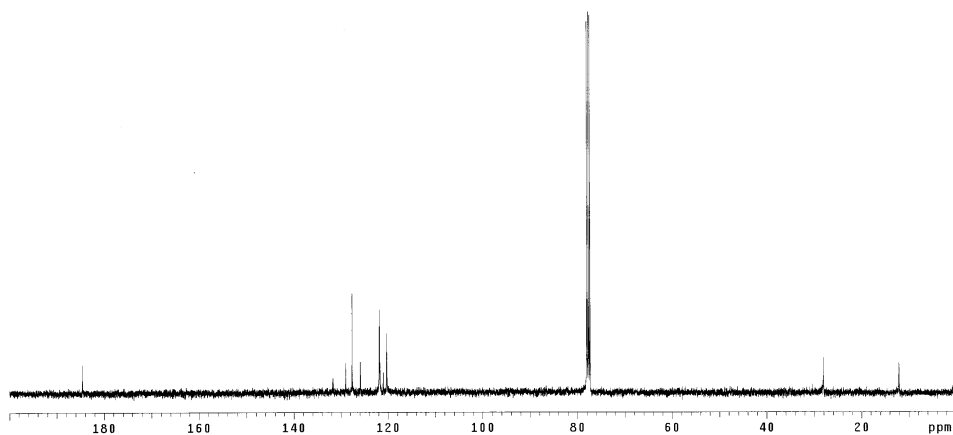

YHS-V-140-1  
Pulse Sequence: s2pu1

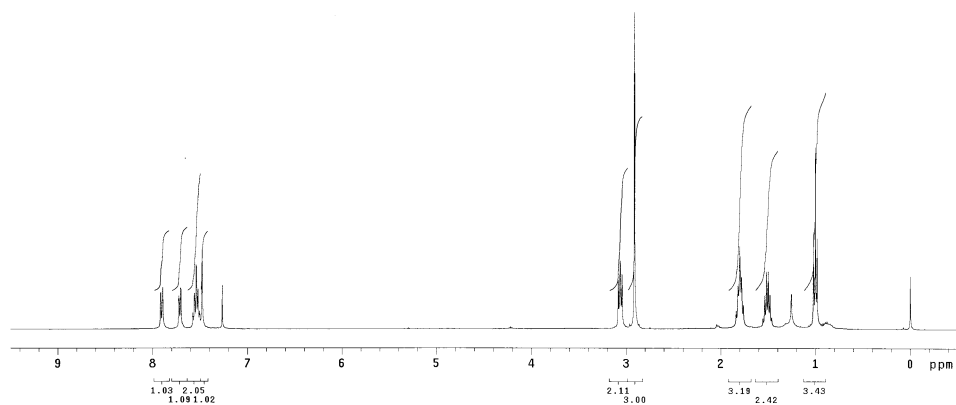

YHS-V-140-1  
Pulse Sequence: s2pu1

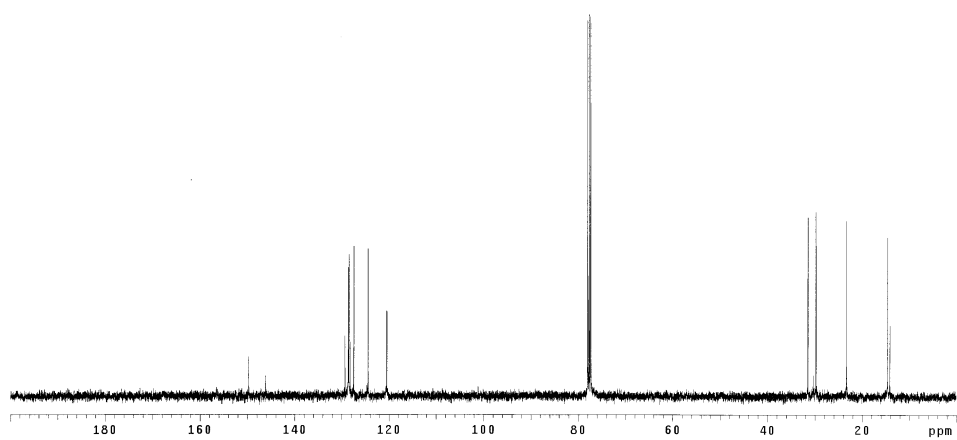



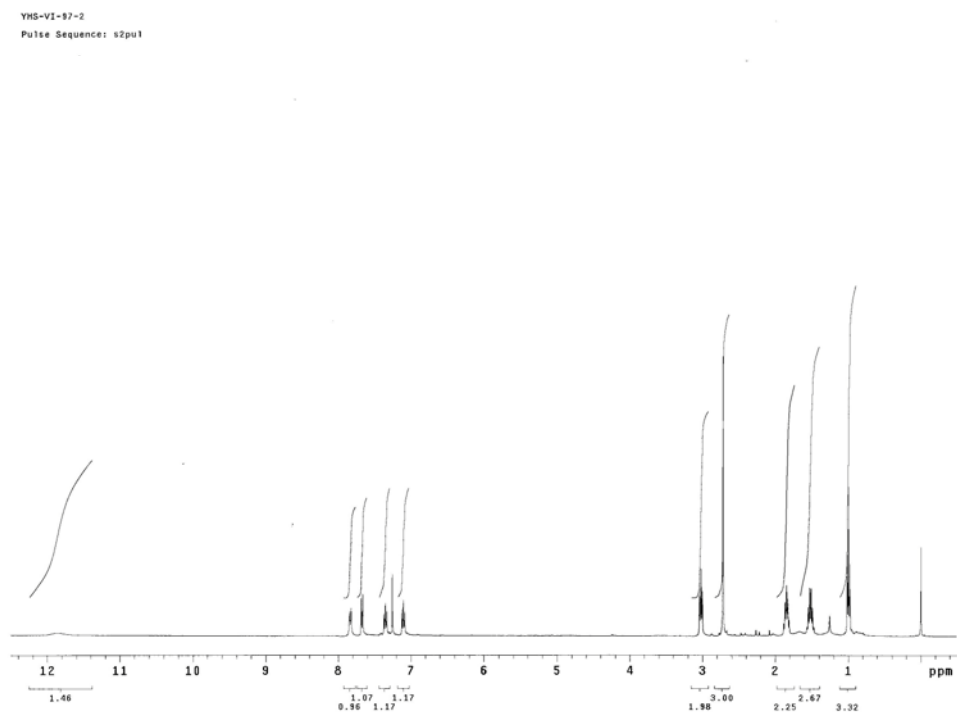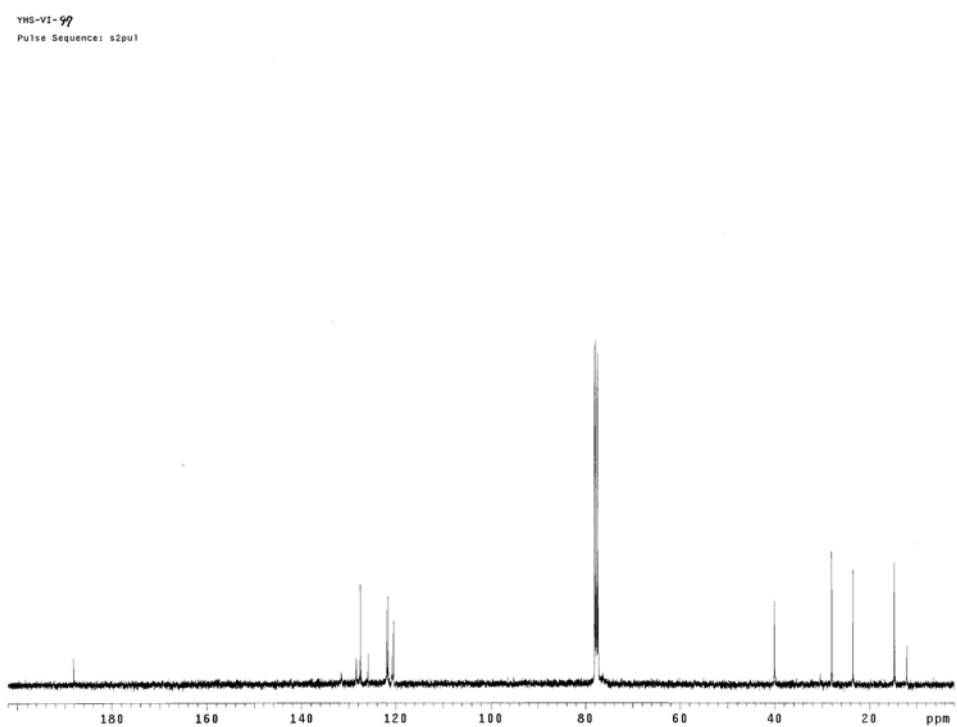

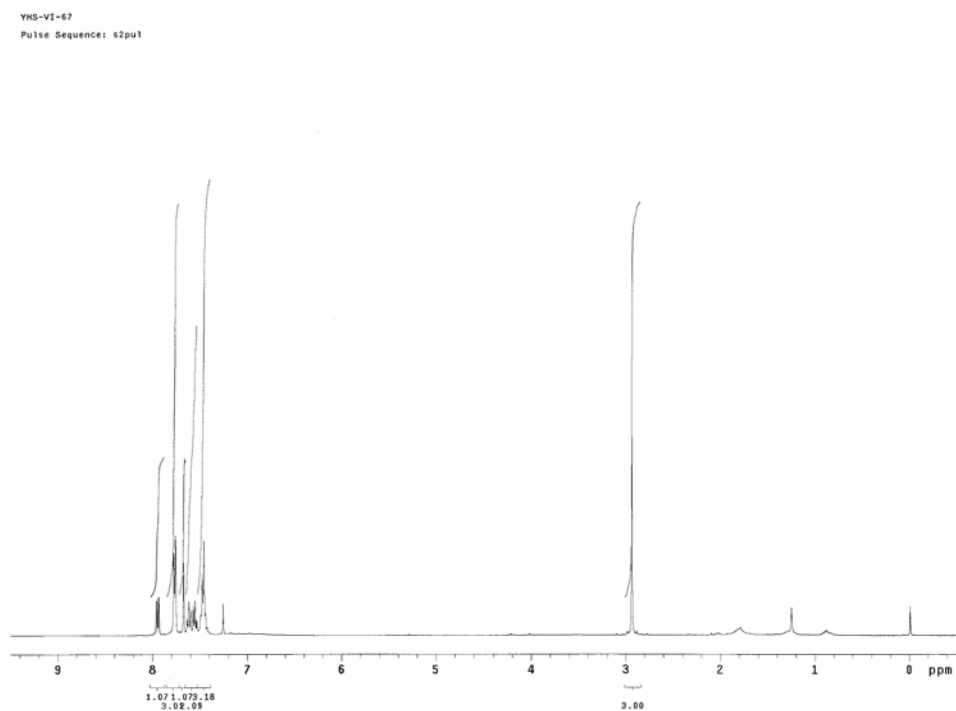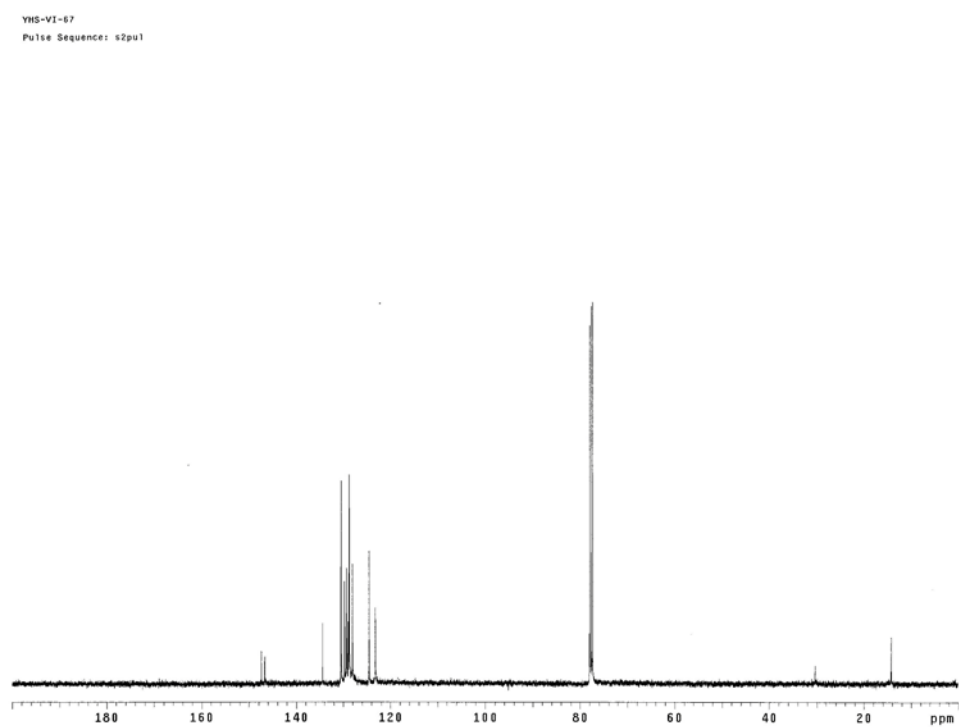

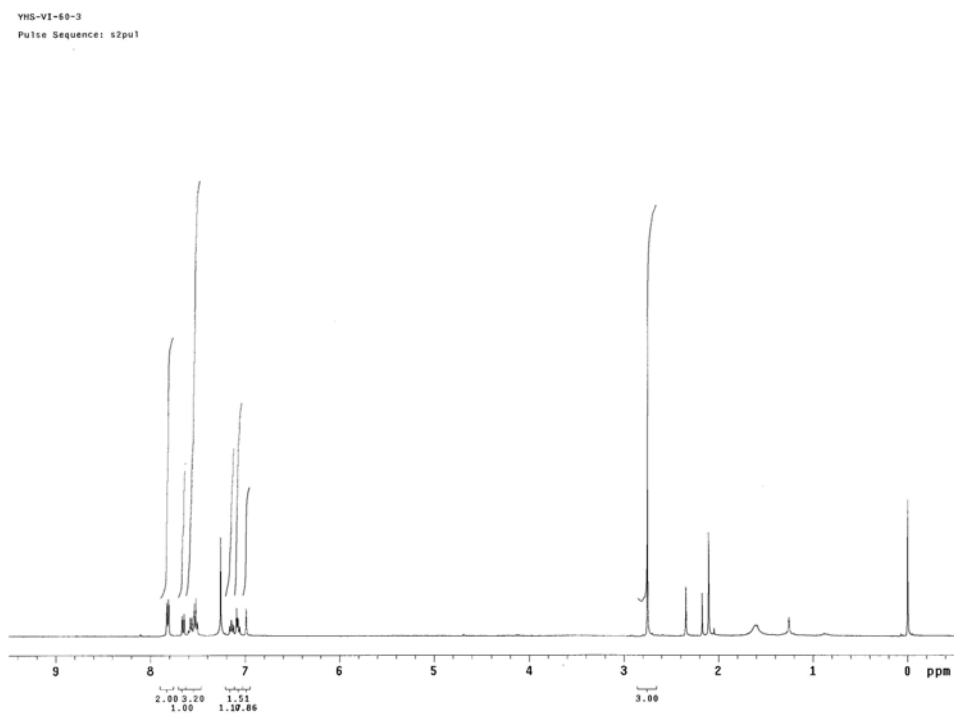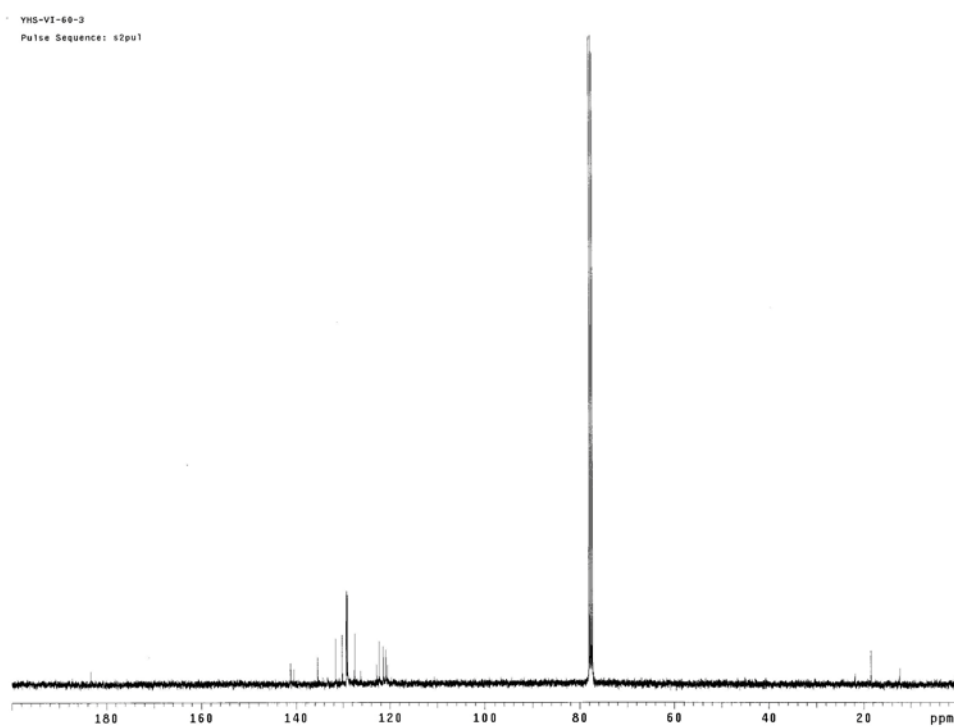

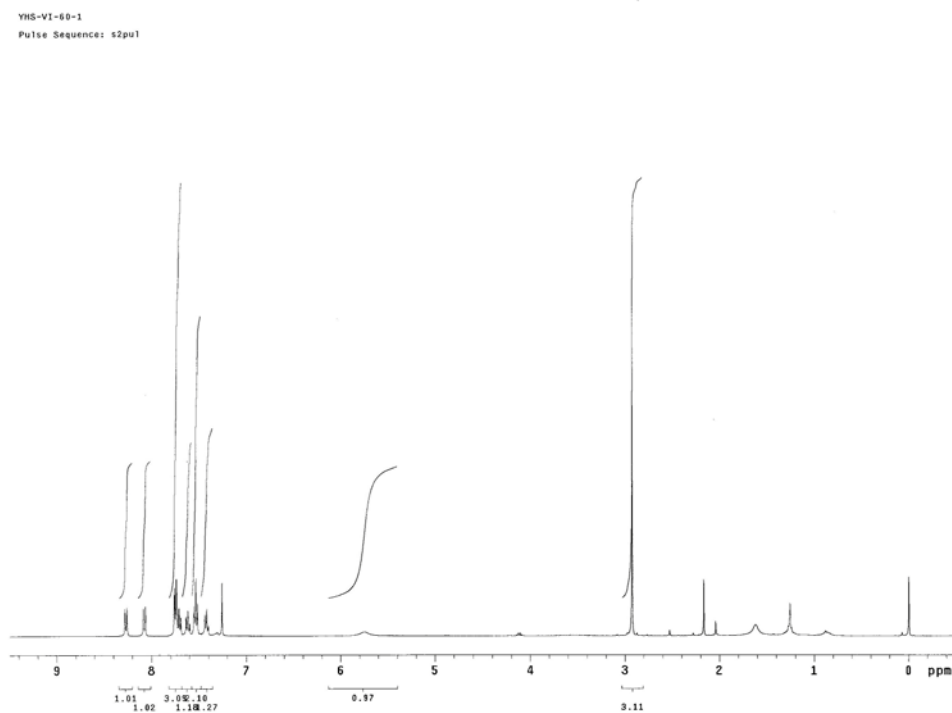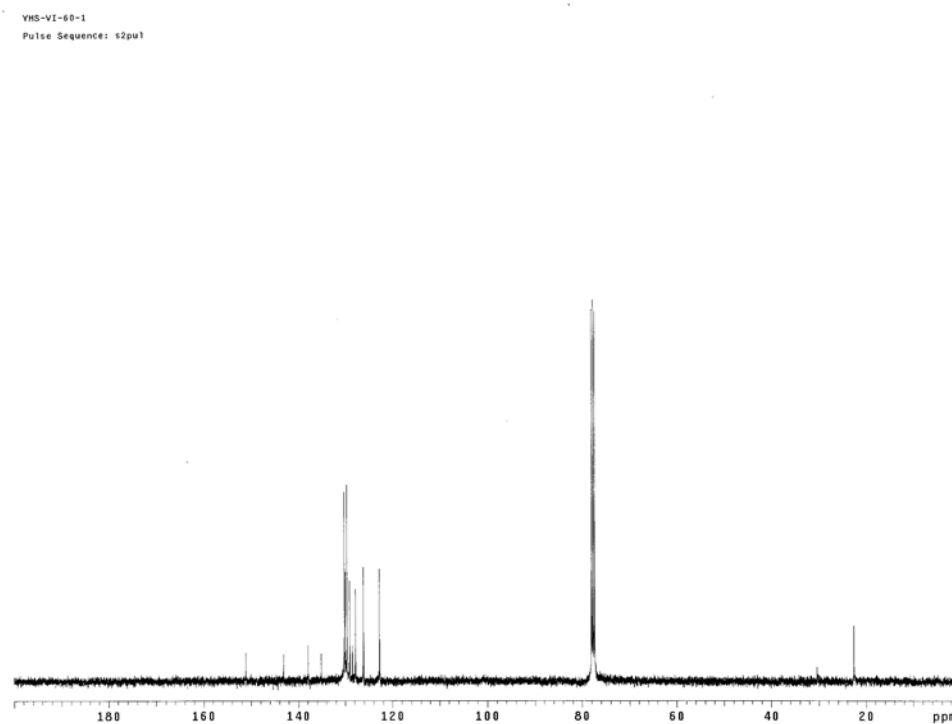

YHS-VI-58  
Pulse Sequence: s2pu1

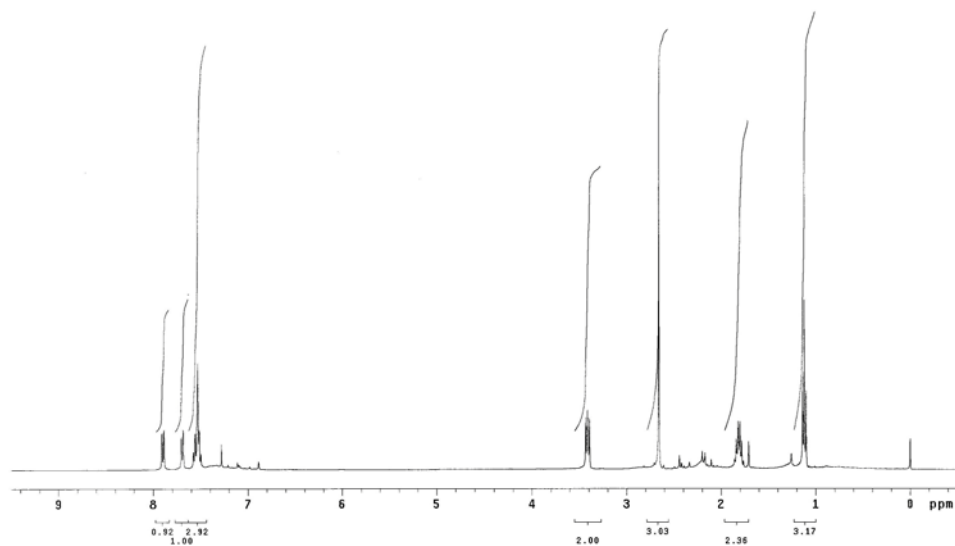

YHS-VI-58  
Pulse Sequence: s2pu1

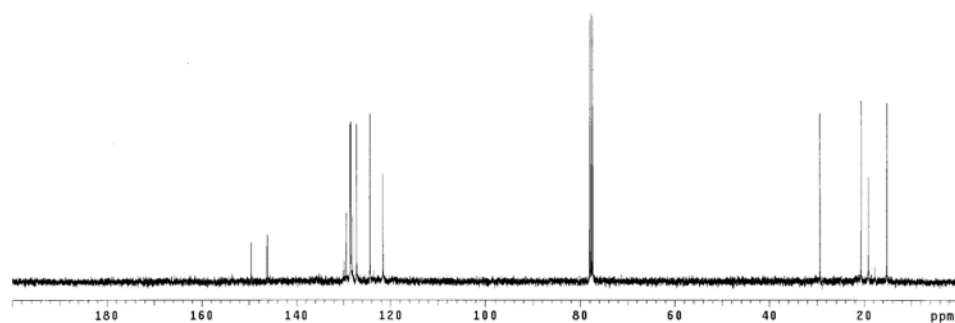

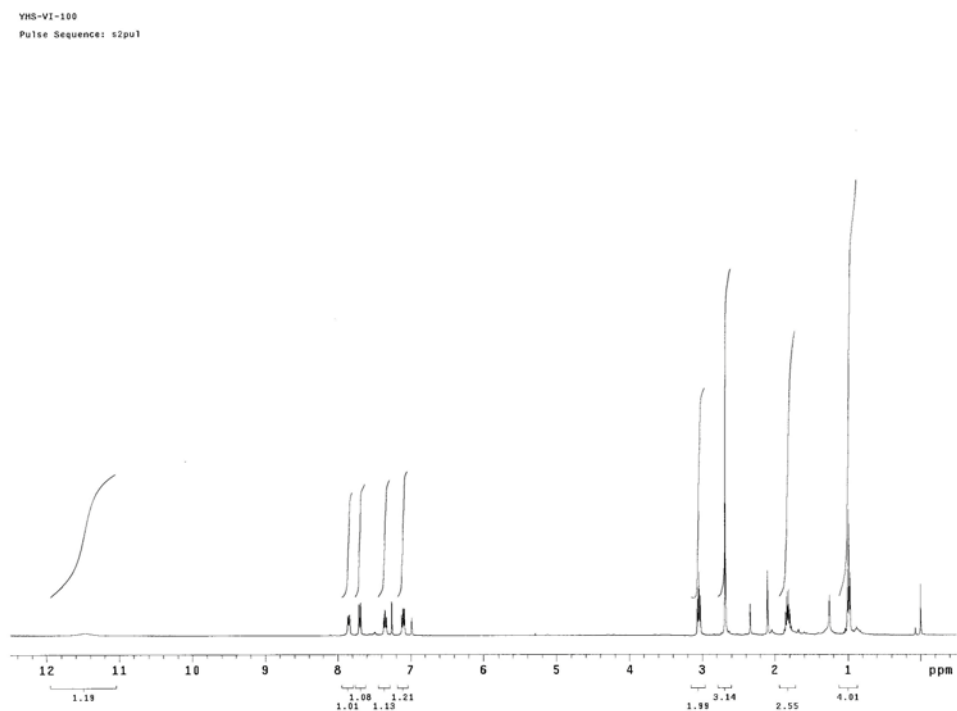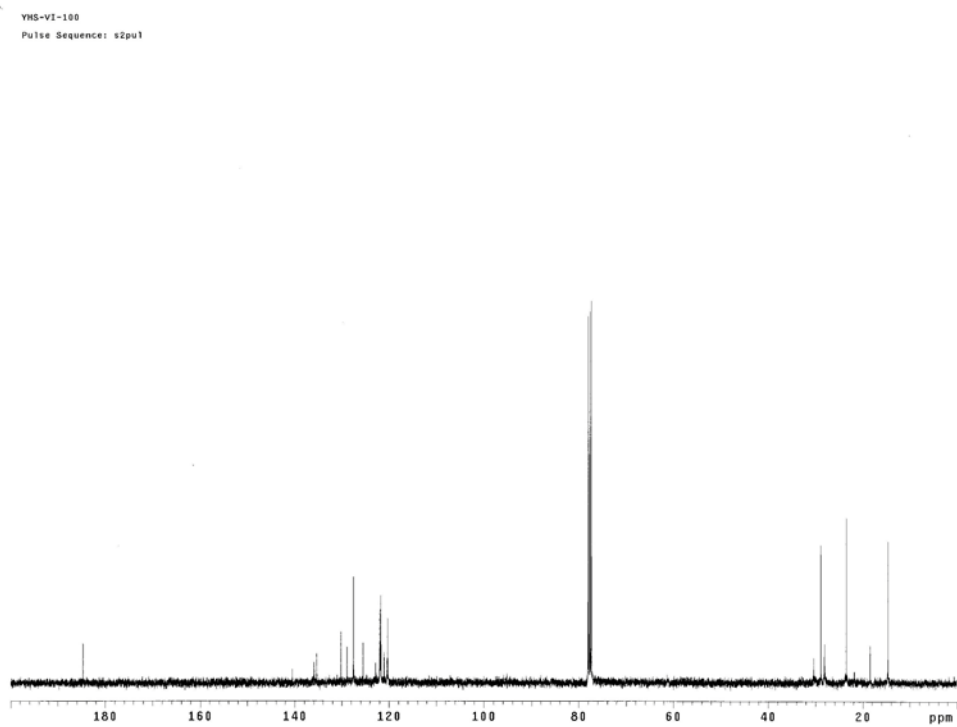

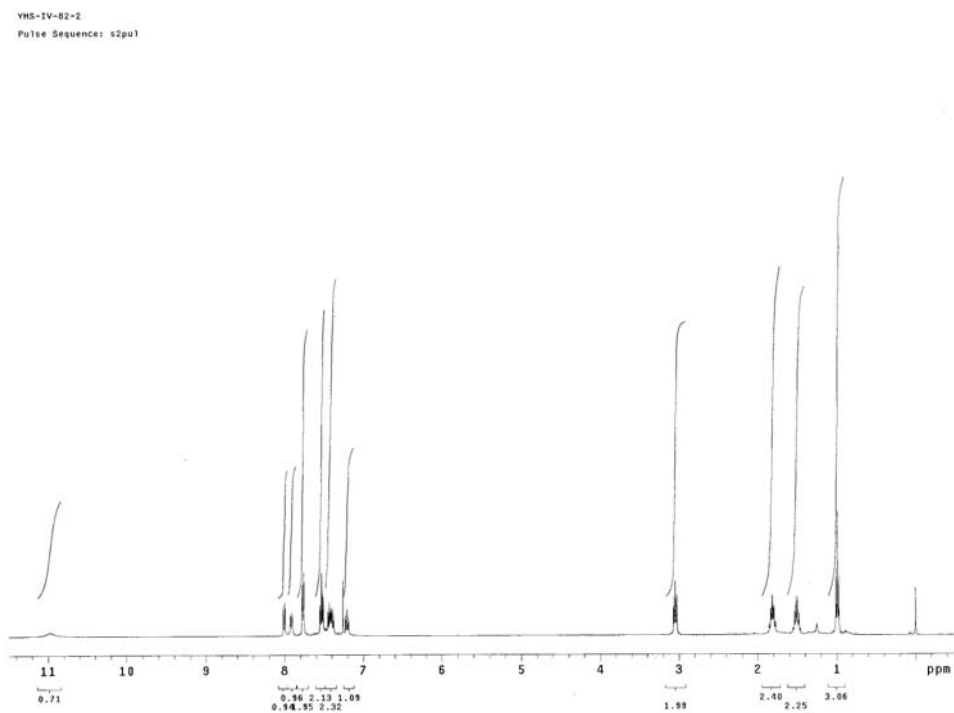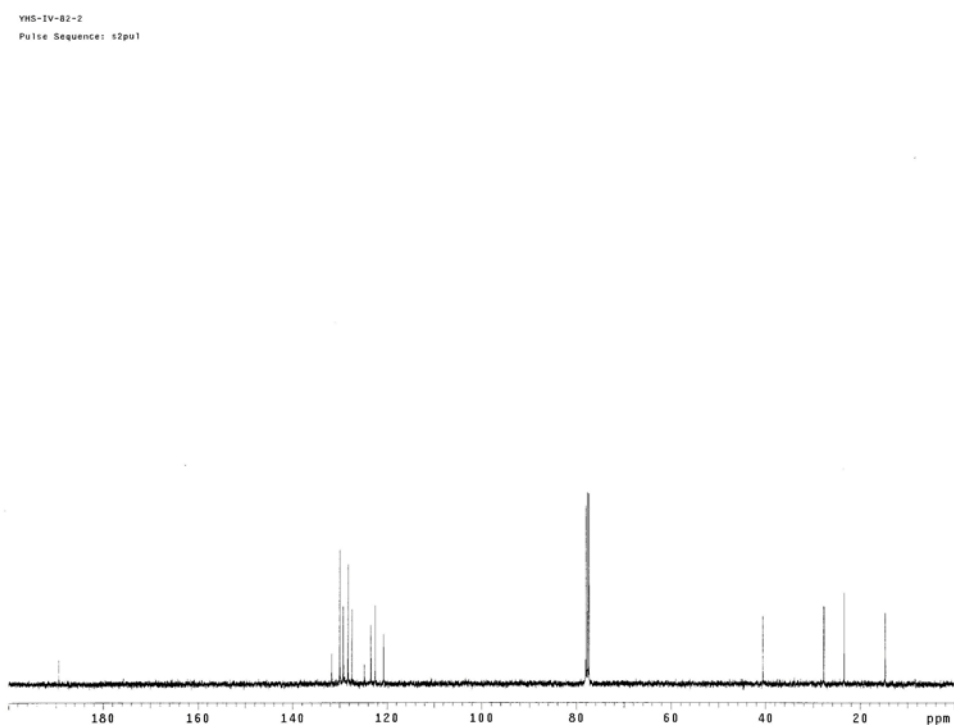

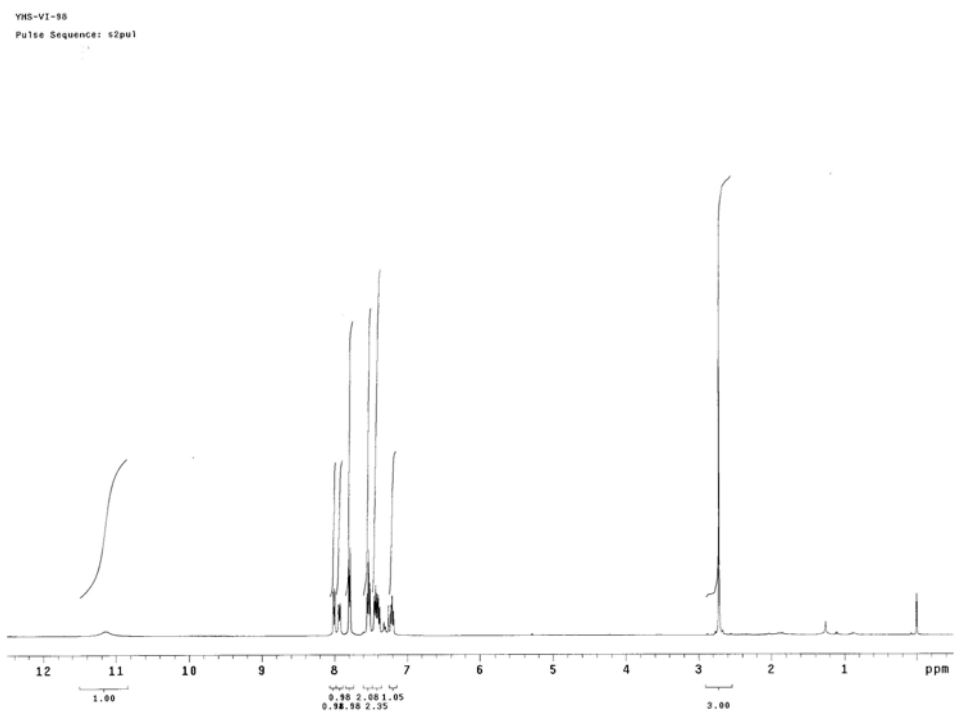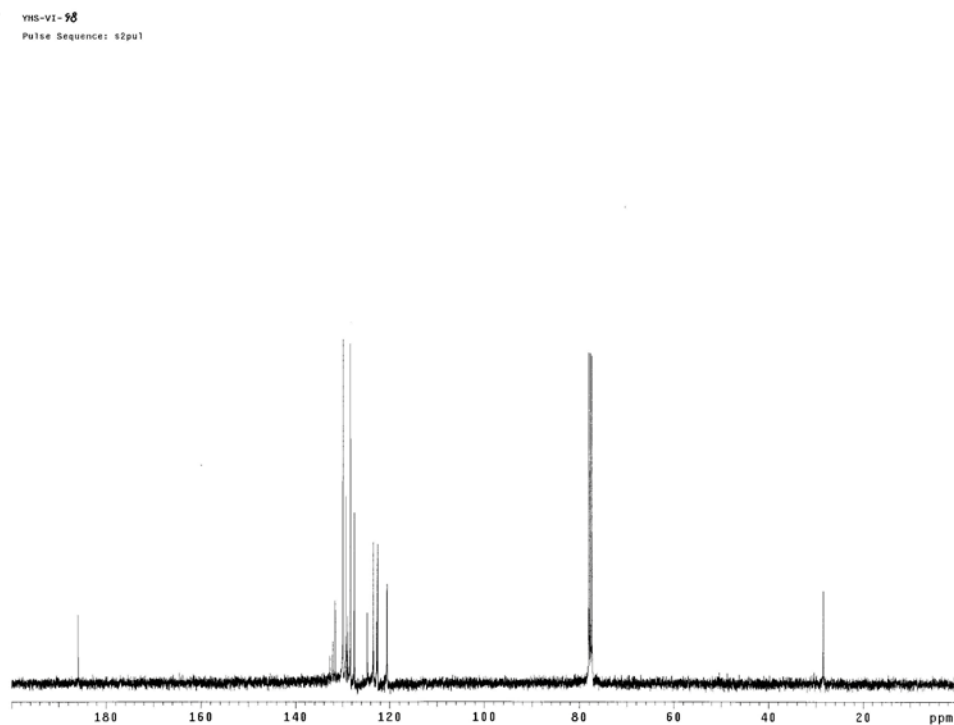



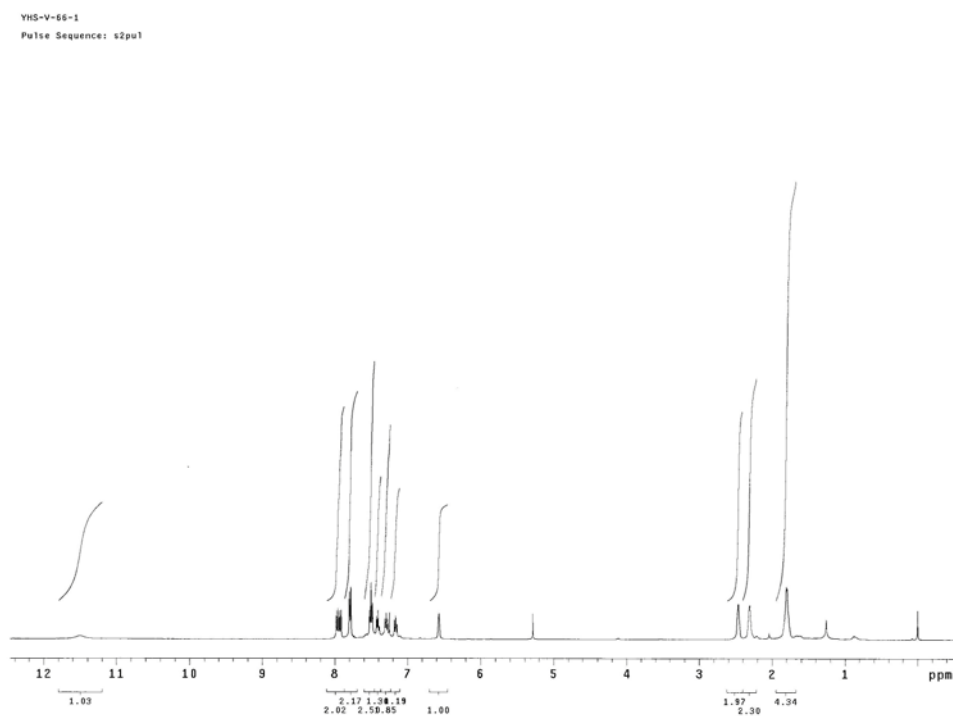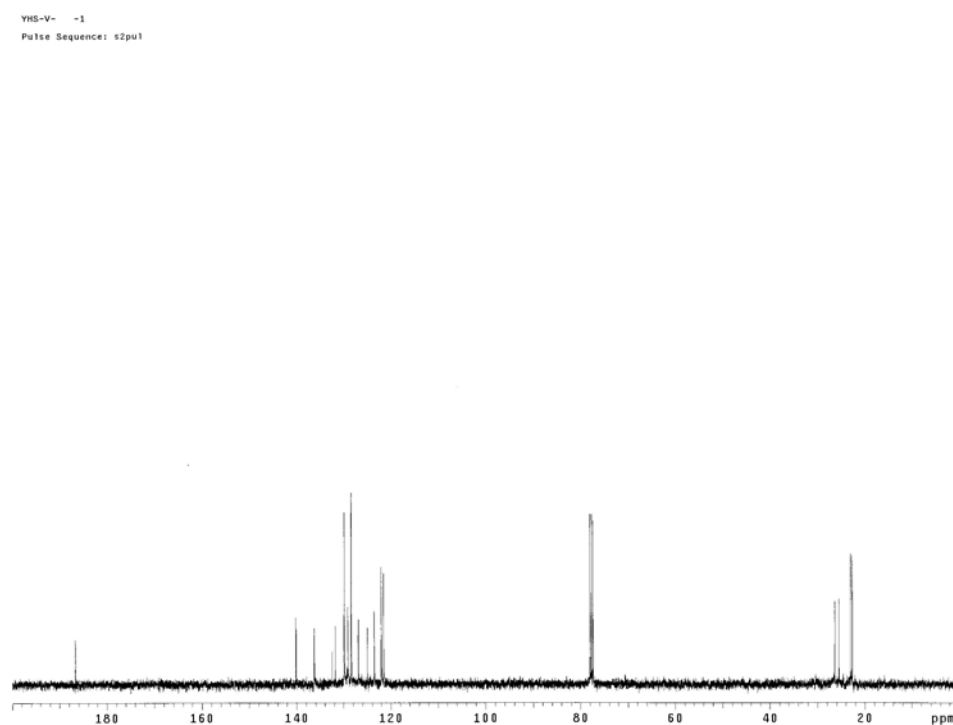

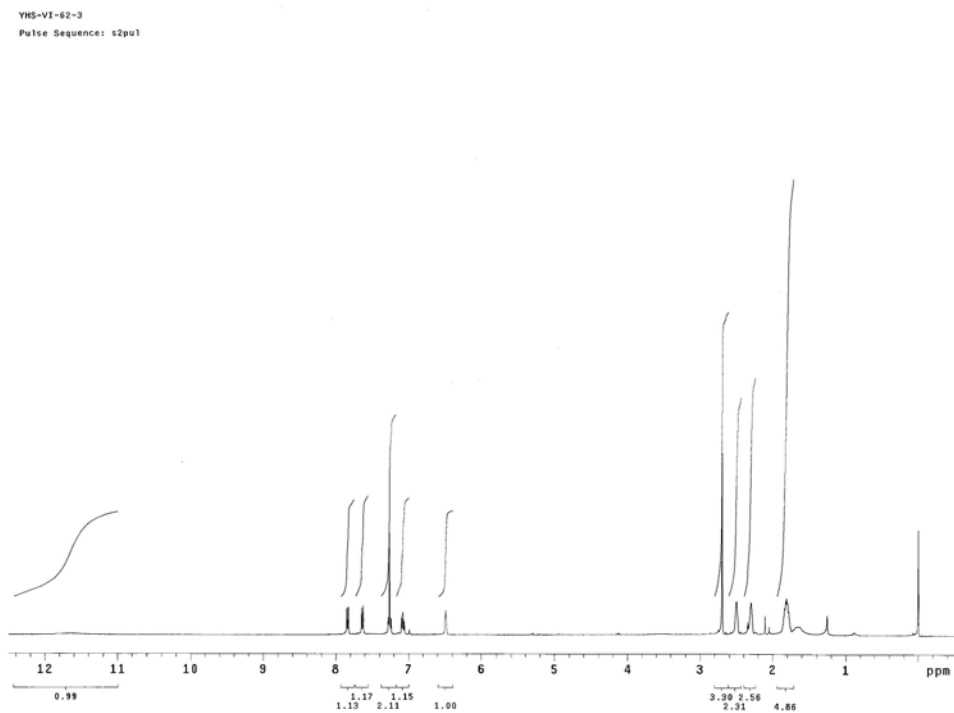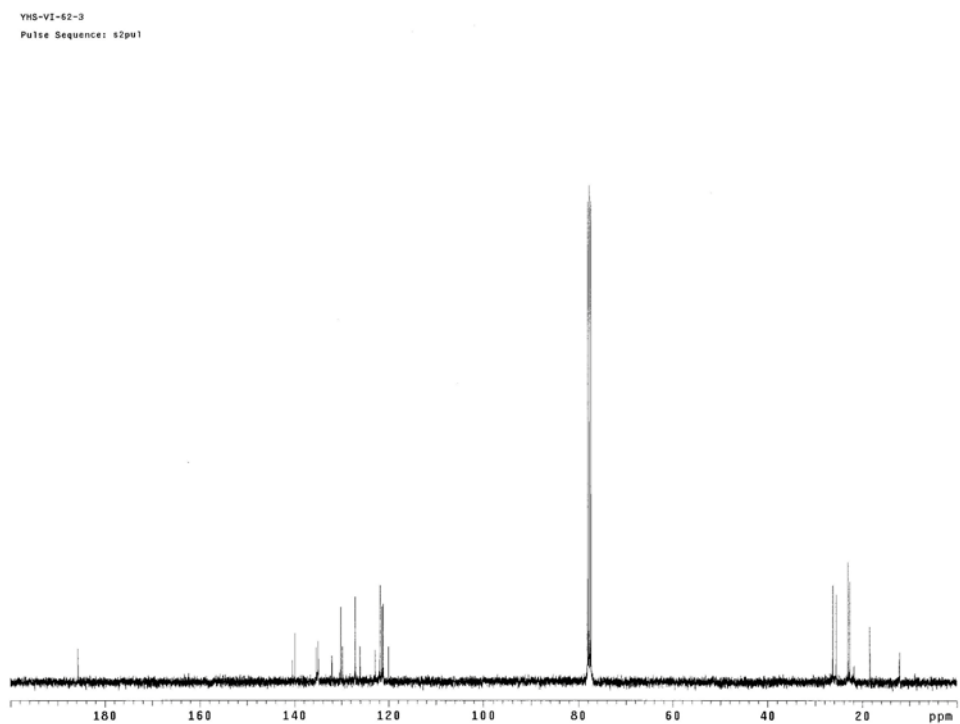

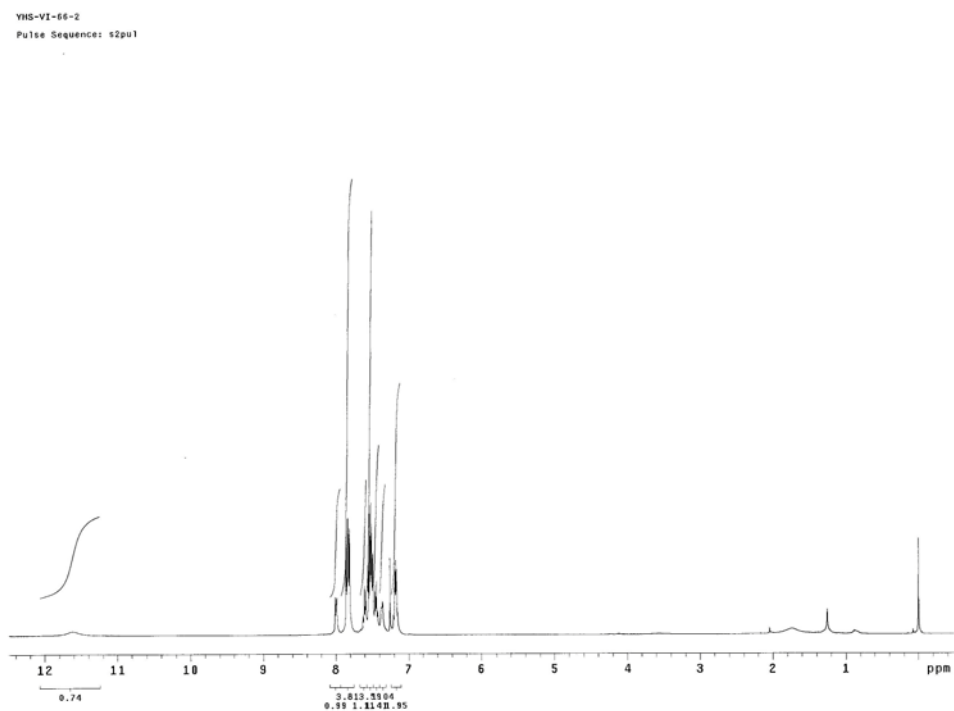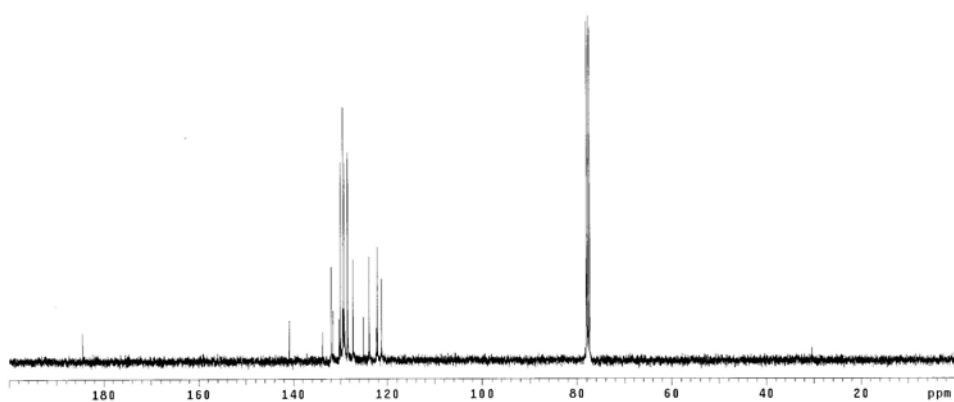

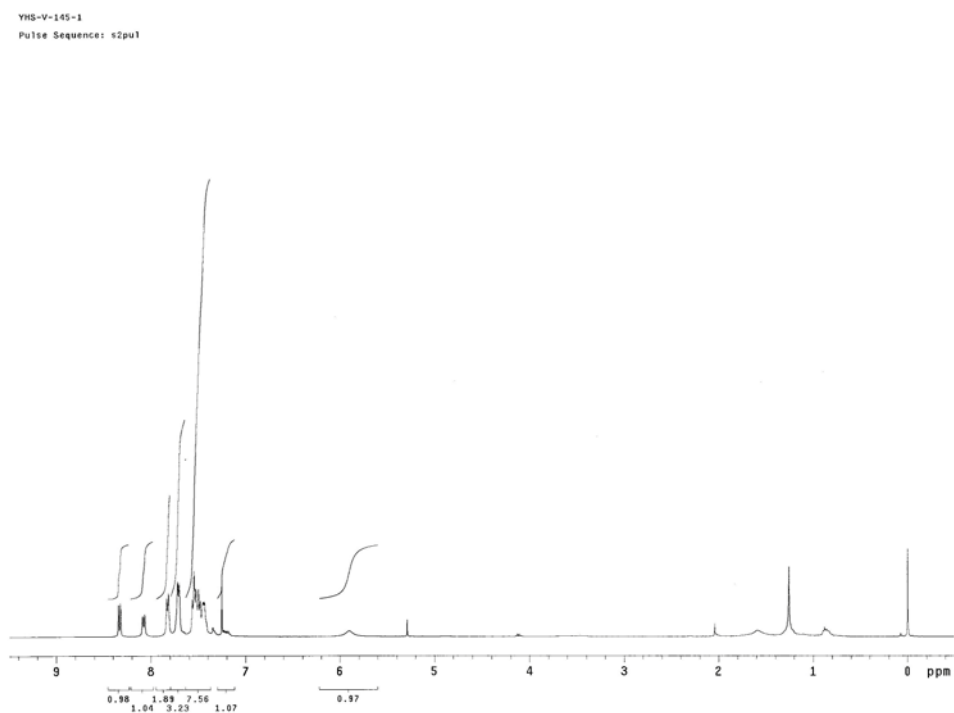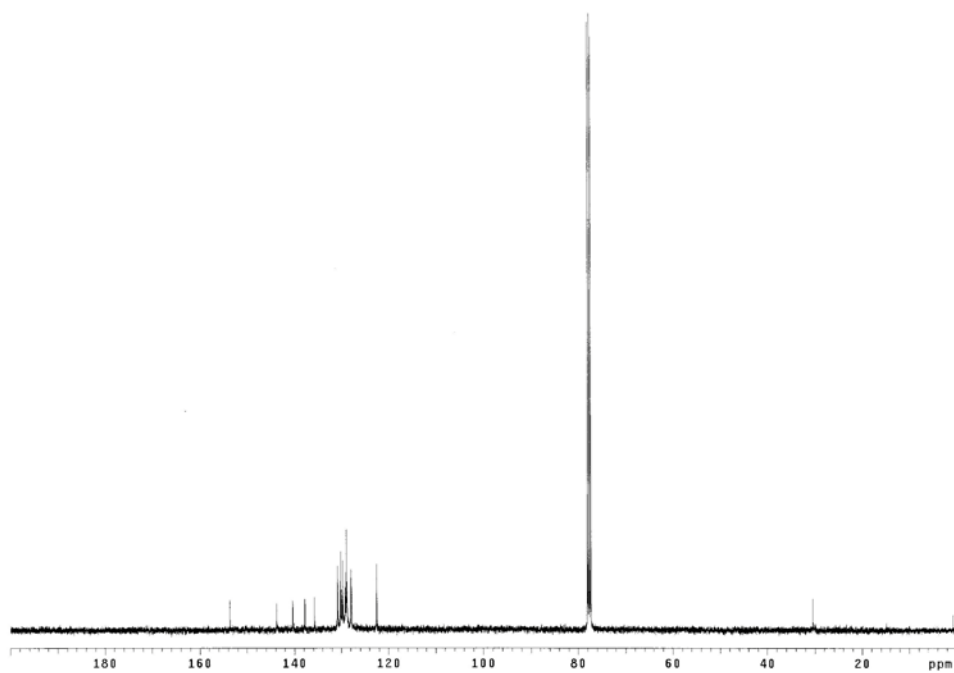

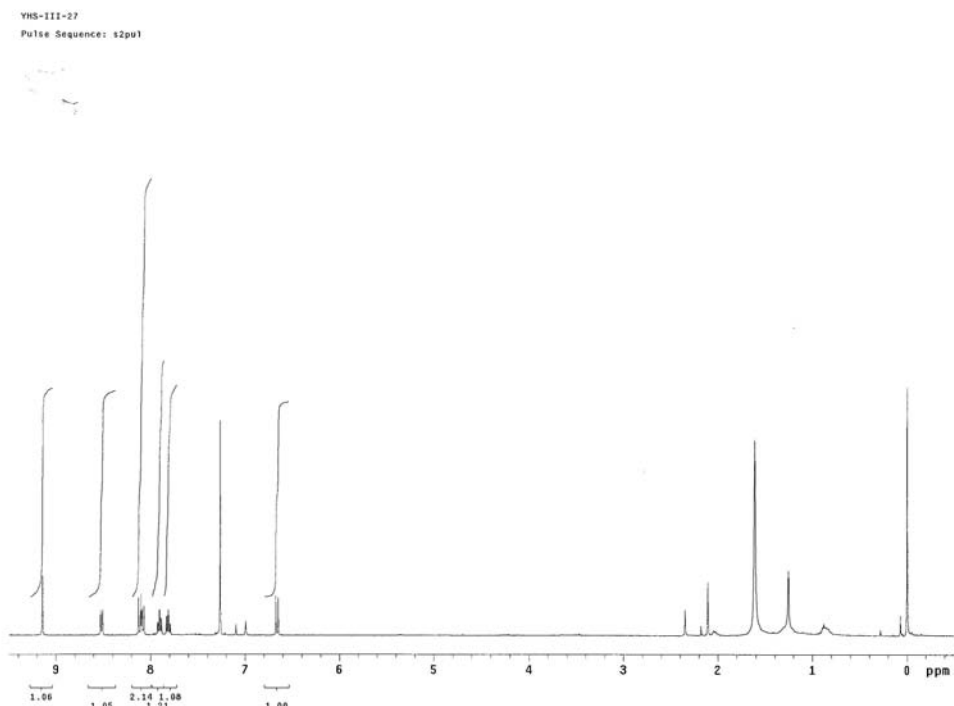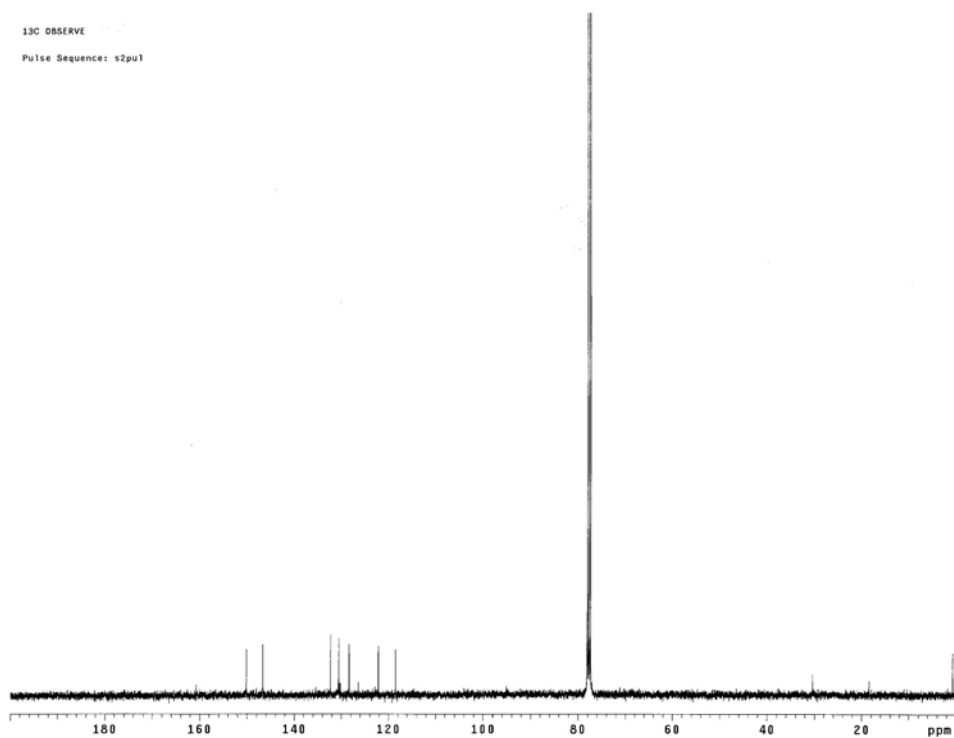

YHS-III-28  
Pulse Sequence: COSY  
Solvent: CDCl<sub>3</sub>  
Ambient temperature  
User: 1-12-87  
Mercury-400BB "nmr400MHZ"  
Relax. delay 1.000 sec  
Acq. time 0.170 sec  
Width 6009.6 Hz  
2D Width 6009.6 Hz  
2 repetitions  
128 increments  
OBSERVE F1, 399.8620369 MHz  
DATA PROCESSING  
Sf. sine bell 0.085 sec  
F1 DATA PROCESSING  
Sf. sine bell 0.021 sec  
FT size 2048 x 2048  
Total time 5 min, 46 sec

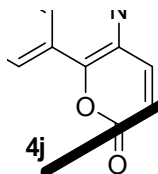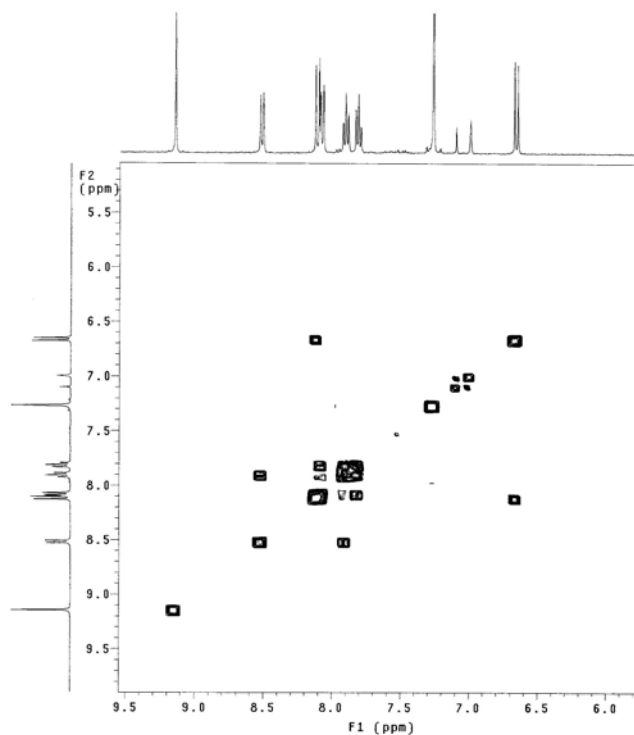

LYG-II-59-H  
Pulse Sequence: s2pul

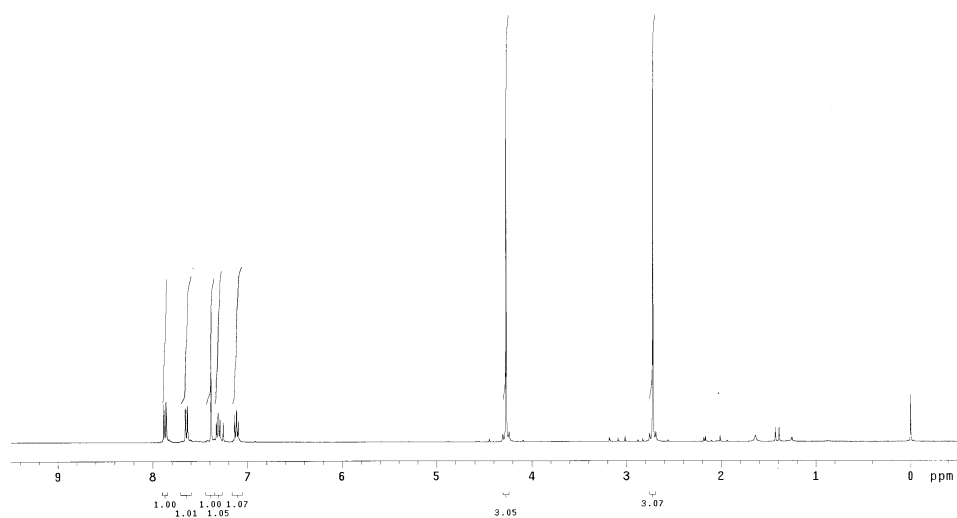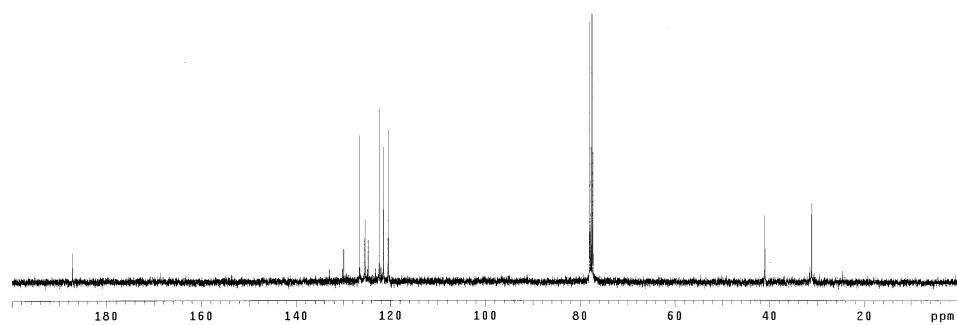

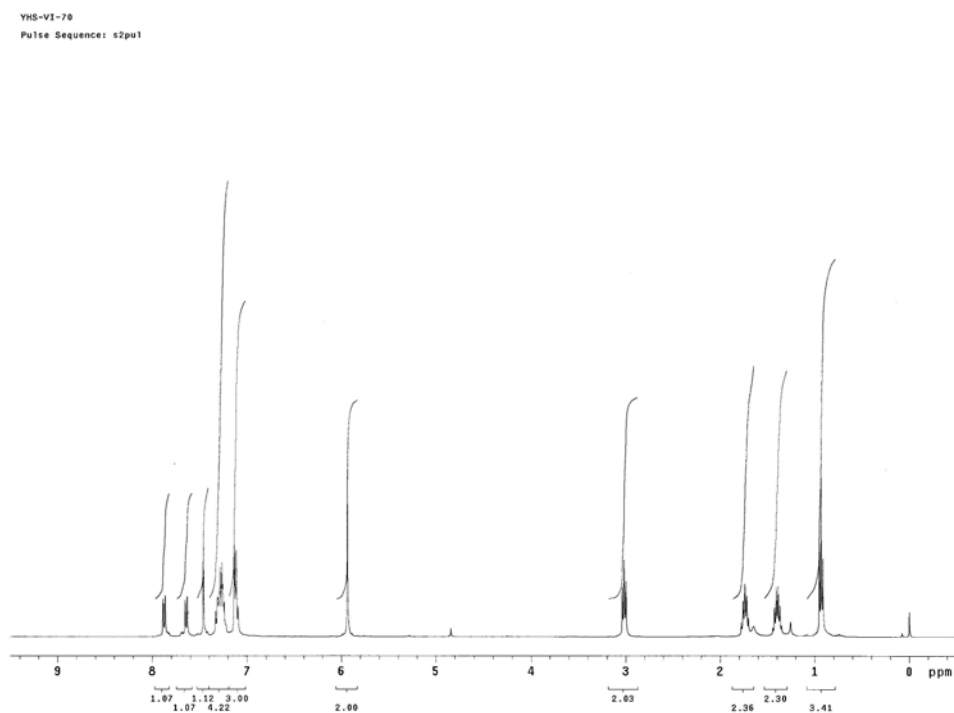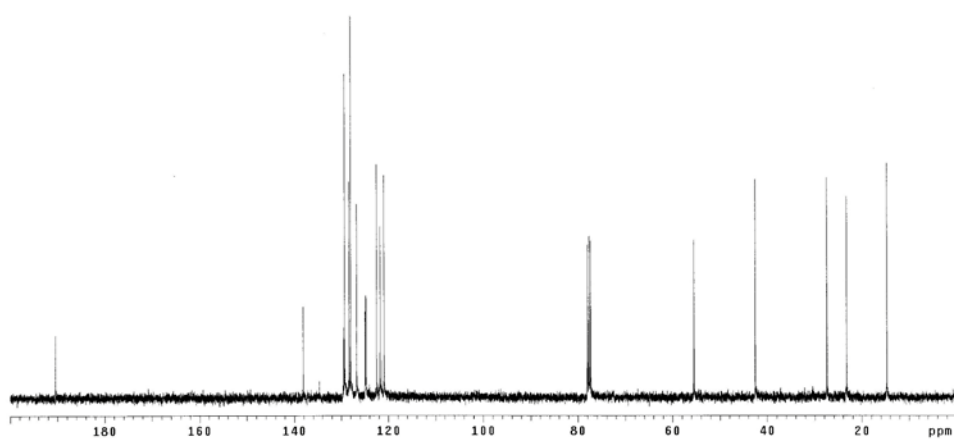



YHS-VI-76  
Pulse Sequence: s2pu1

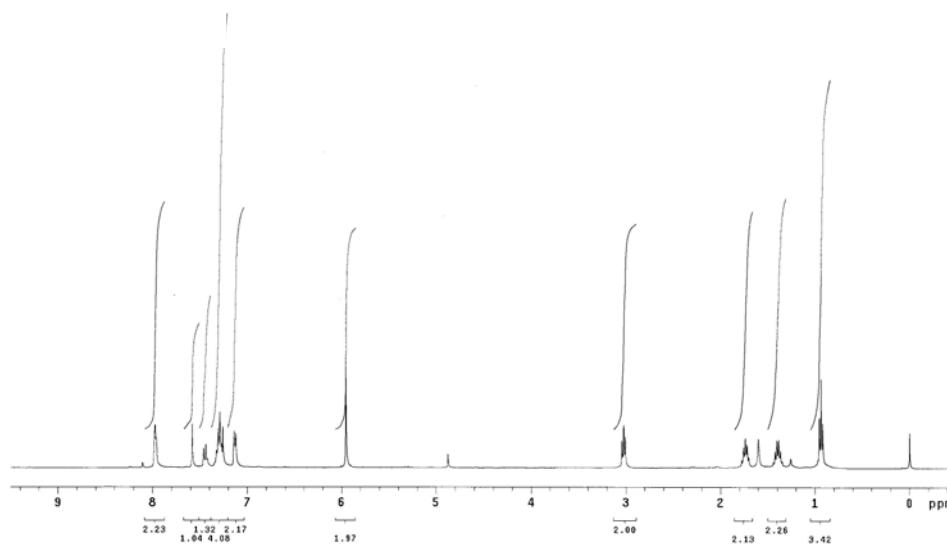

YHS-VI-76  
Pulse Sequence: s2pu1

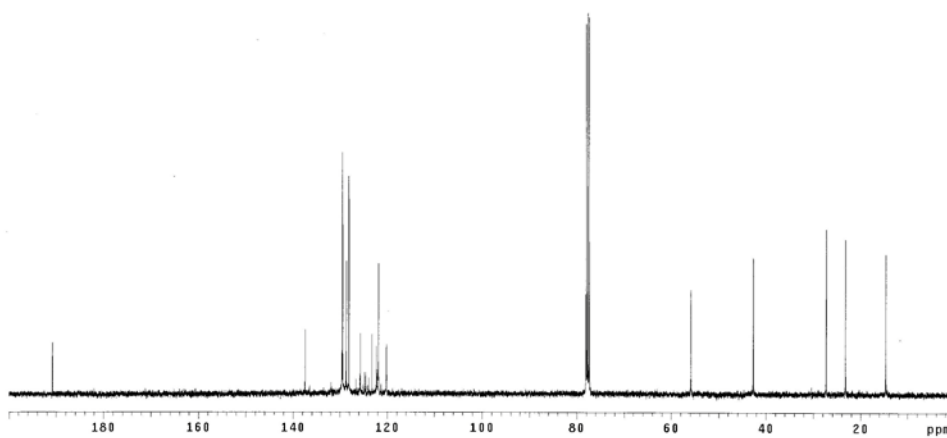

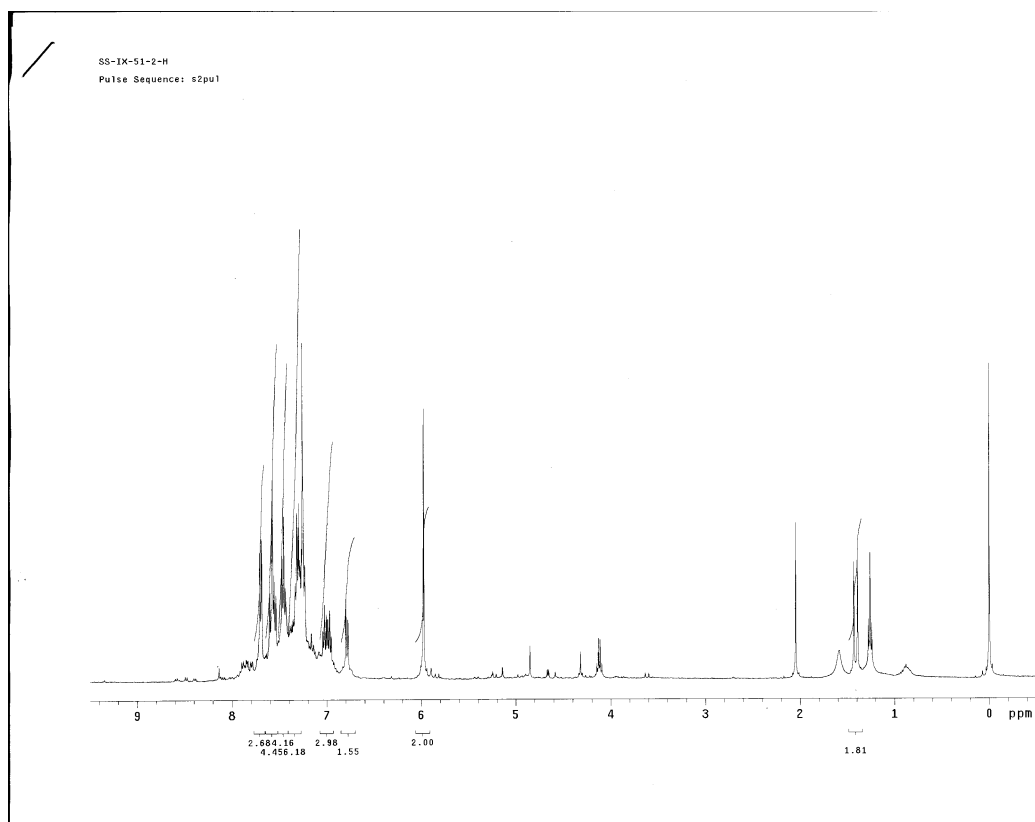

LYG-II-57-H  
Pulse Sequence: s2pu1

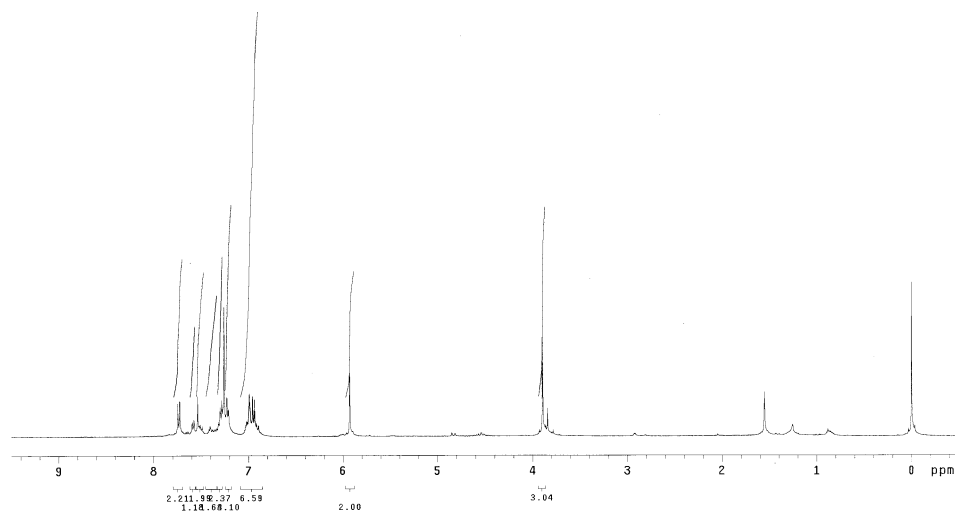

LYG-II-57-C13  
Pulse Sequence: s2pu1

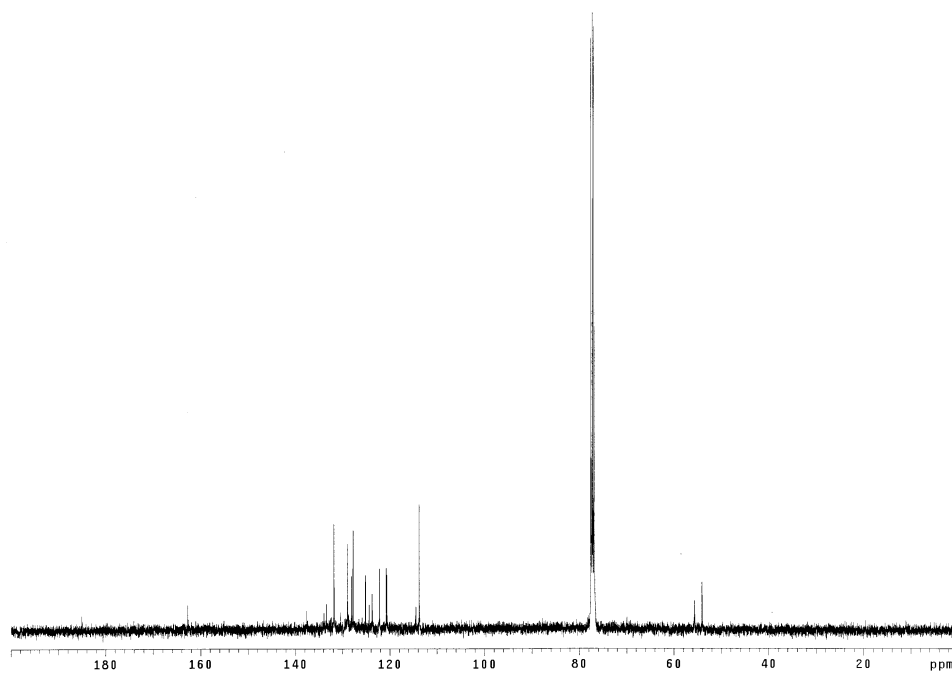

LYG-II-51  
Pulse Sequence: s2pu1

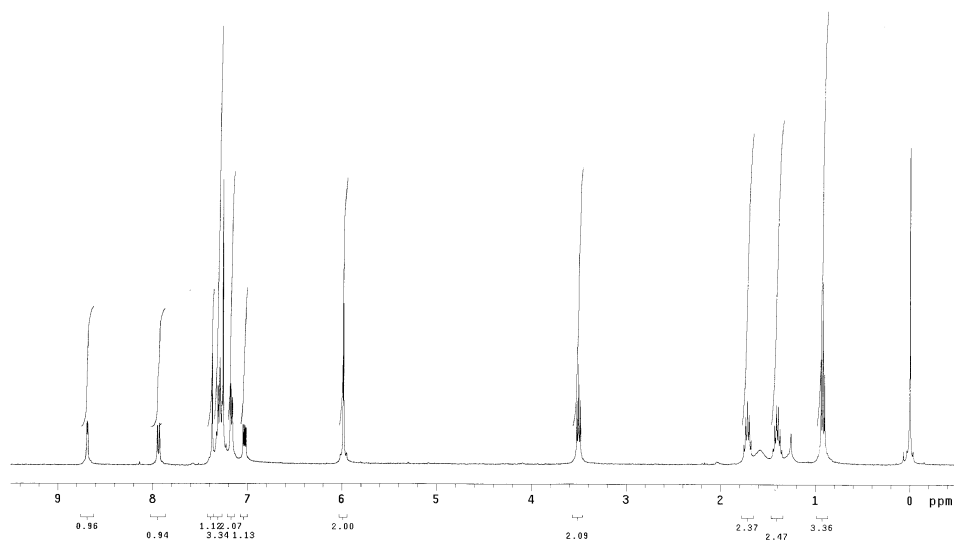

SS-IX-66-13C  
Pulse Sequence: s2pu1

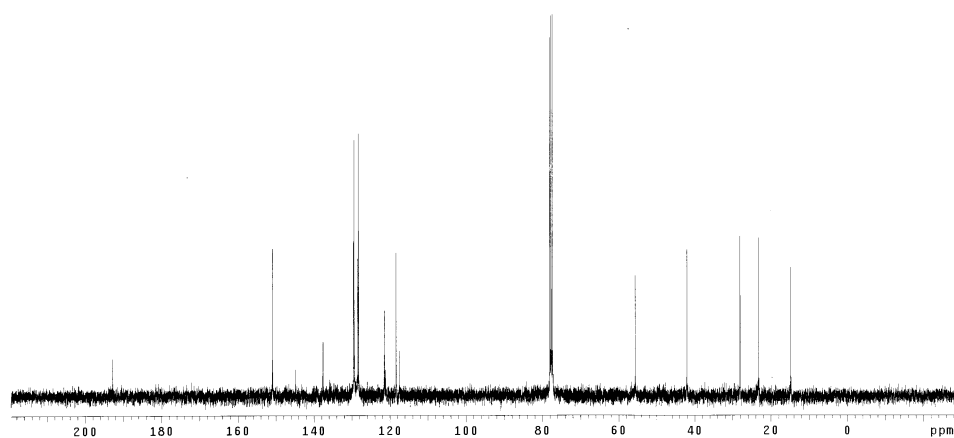

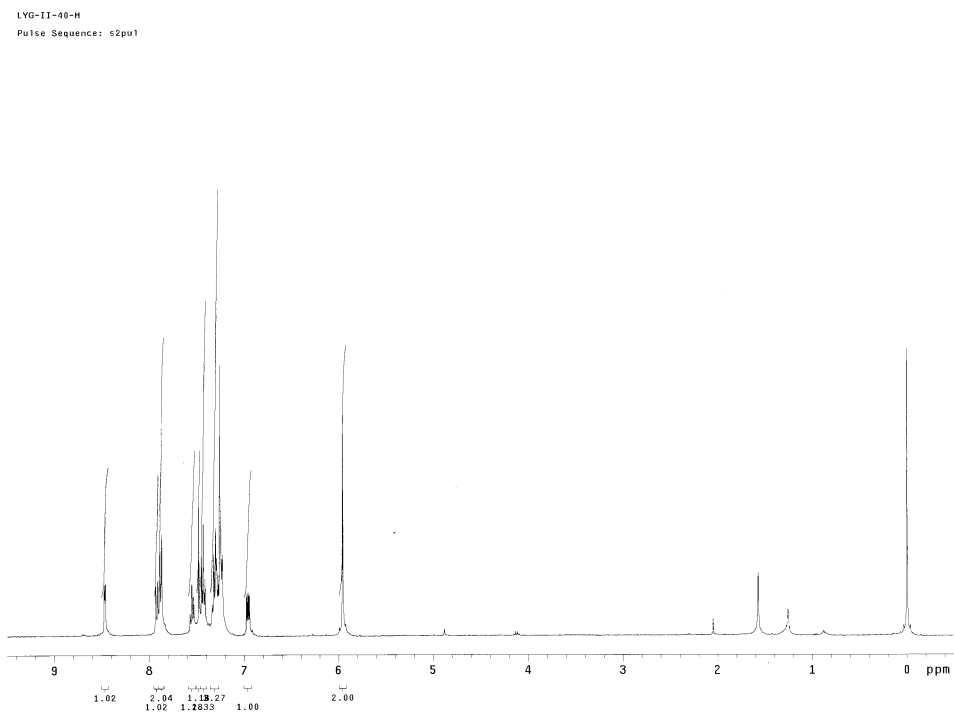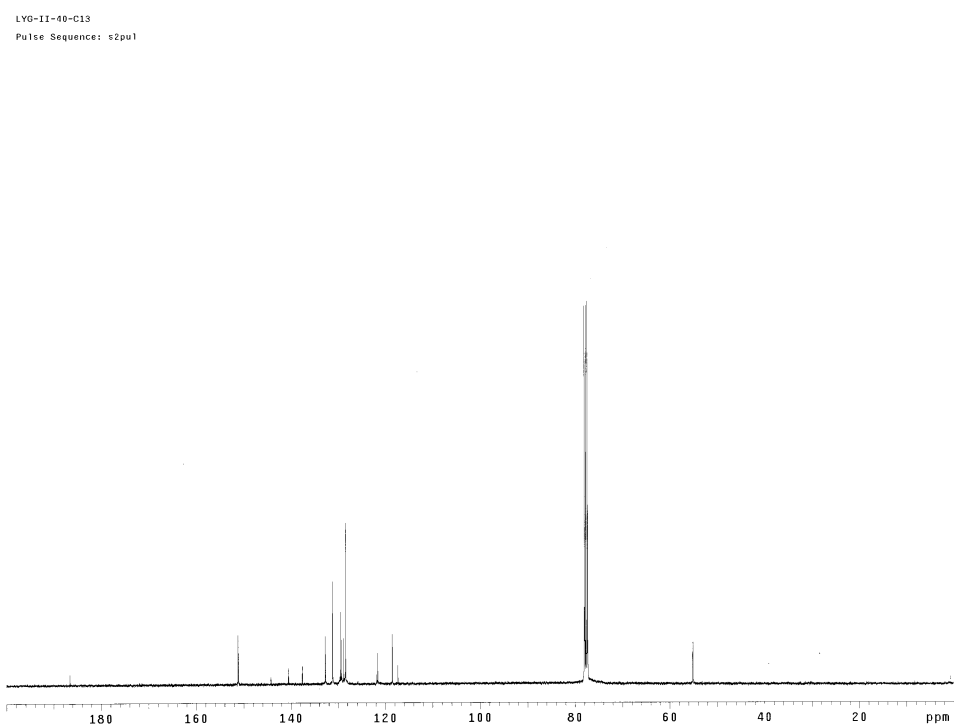

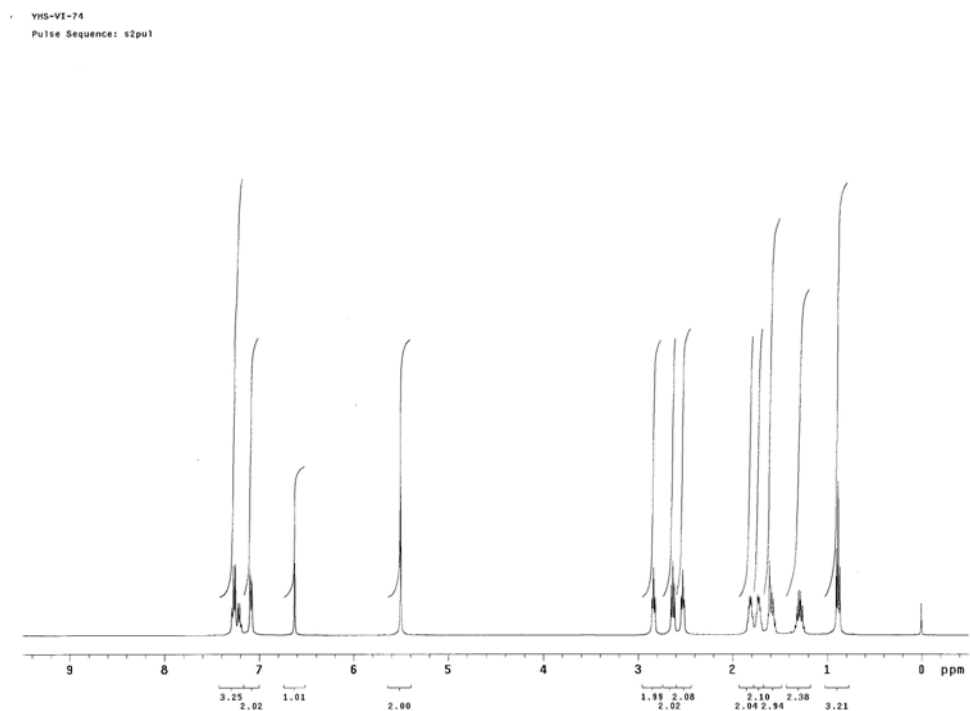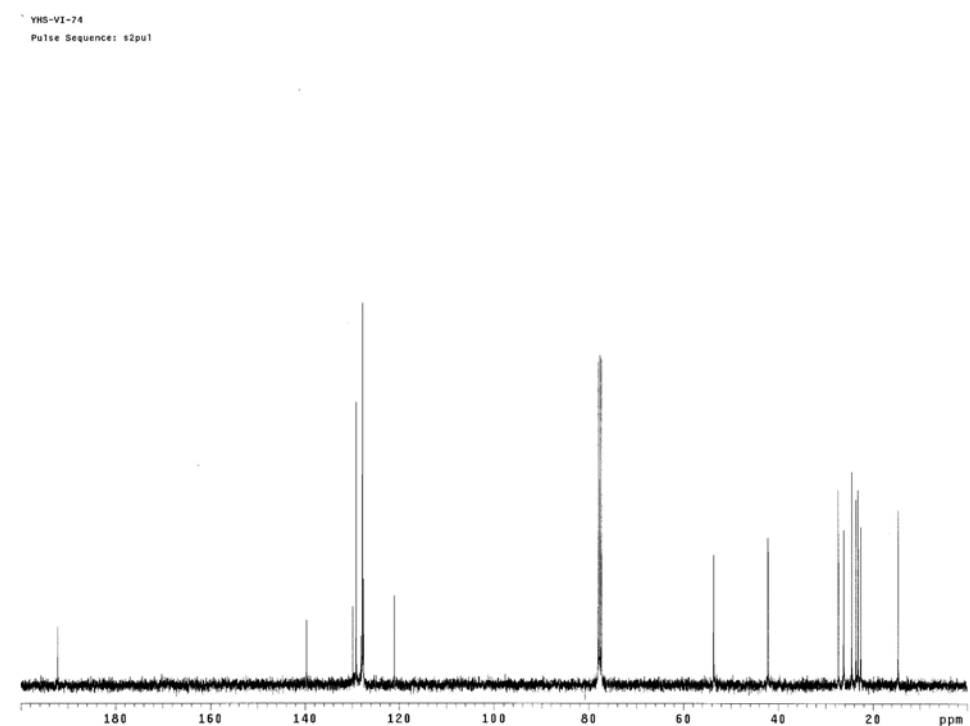

Supplement: b910757f.pdf [file b910757f.pdf]
